# Supplementary material for: Precise gene models using long-read sequencing reveal a unique poly(A) signal in Giardia lamblia
Source: RNA. 2022 May;28(5):668–82. doi: 10.1261/rna.078793.121 (PMC9014877; doi:10.1261/rna.078793.121)
Supplement: Supplemental Material [file supp_078793.121_Supplemental_Table_2_TailLengths.xlsx]

## Sheet: Supplemental_table_1_211020
gene_id	description	n_rep1	n_rep2	median_rep1	median_rep2	median_all
GL50803_135003	Histone H4	186	174	70.035	61.14	67.7
GL50803_27878	hypothetical protein	5	8	83.84	55.51	75.34
GL50803_15598	Vacuolar ATP synthase 16 kDa proteolipid subunit	41	49	63.52	61.83	62.105
GL50803_14019	Cathepsin B precursor	2447	991	67.86	68.46	68.04
GL50803_17153	Alpha-11 giardin	532	494	66.58	62.685	64.325
GL50803_4547	Ribosomal protein S9	439	413	61.79	63.92	62.485
GL50803_27521	Histone H2A	402	328	68.41	73.1	69.69
GL50803_16125	Glycerol-3-phosphate dehydrogenase	195	96	74.73	76.755	74.83
GL50803_86511	Acyl-CoA synthetase	242	168	73.68	69.06	71.865
GL50803_19401	hypothetical protein	26	18	78.2	56.6	72.095
GL50803_3910	hypothetical protein	275	285	85.17	79.07	82.04
GL50803_11321	hypothetical protein	19	4	91.85	59.835	85.55
GL50803_7082	Ribosomal protein S21	497	303	54	56.12	55.015
GL50803_19509	hypothetical protein	469	349	61.48	56.76	59.915
GL50803_17532	hypothetical protein	7	5	54.16	70.87	61.895
GL50803_40591	VSP	9180	8762	58.69	59.74	59.19
GL50803_114201	hypothetical protein	13	4	67	86.725	71.19
GL50803_35341	hypothetical protein	19	5	70.3	77.62	73.96
GL50803_2053	Serine/threonine protein phosphatase 4	16	33	79.345	78.07	78.07
GL50803_8377	hypothetical protein	104	47	61.195	77.24	66.28
GL50803_38901	VSP	319	9	65.33	47.03	65.035
GL50803_112312	Elongation factor 1-alpha	1650	1412	58.93	59	58.965
GL50803_15228	Ribosomal protein S15A	984	782	50.3	56.445	52.98
GL50803_21942	NADP-specific glutamate dehydrogenase	1058	359	61.825	65	62.86
GL50803_16279	Kinase, NEK	19	15	56.96	64.29	59.565
GL50803_4812	Beta-giardin	1256	1481	59.75	58.14	58.8
GL50803_11654	Alpha-1 giardin	1045	1015	59.12	58.77	59
GL50803_113677	Coiled-coil protein	169	59	63.46	72.84	66.215
GL50803_100906	Dynein heavy chain, putative	49	18	55.59	59.54	55.59
GL50803_3331	Malate dehydrogenase	214	367	66.71	69	68.2
GL50803_16013	Spindle pole protein, putative	16	12	57.295	76.375	63.405
GL50803_13268	hypothetical protein	364	368	48.67	49.88	49.04
GL50803_16114	Ribosomal protein L36-1	399	320	52.12	51.13	51.32
GL50803_17468	hypothetical protein	61	52	53.86	64.315	57.96
GL50803_15162	Ubiquitin-conjugating enzyme E2-17 kDa	8	6	77.72	72.21	75.93
GL50803_5845	Ribosomal protein S8	457	403	62.19	61.44	61.67
GL50803_11470	VSP with INR	1231	11	64.74	70.74	64.77
GL50803_137730	Kinase	13	3	88.29	75.2	86.935
GL50803_15954	hypothetical protein	31	17	69.63	75.52	70.335
GL50803_17476	CXC-rich protein	56	15	79.85	82.58	80.52
GL50803_4789	hypothetical protein	53	25	80.5	80.77	80.635
GL50803_12981	Ribosomal protein S5	535	609	56.04	55.4	55.605
GL50803_4239	hypothetical protein	297	230	66.22	62.805	64.62
GL50803_16716	High cysteine membrane protein Group 5	76	28	65.64	75.705	66.825
GL50803_14331	VSP	131	1	63.42	31.07	63.355
GL50803_136020	Beta tubulin	339	390	56.87	57.365	57.28
GL50803_14620	Ribosomal protein S6	680	656	50.83	56.415	54.015
GL50803_6687	Glyceraldehyde 3-phosphate dehydrogenase	1313	1369	64.16	69.79	67.075
GL50803_14329	Ribosomal protein S7	482	473	56.56	56.77	56.58
GL50803_17472	Golgi/cell cycle associated protein, putative	21	14	80.74	83.62	80.74
GL50803_16844	hypothetical protein	97	97	78.92	76.15	77.68
GL50803_8742	Extracellular nuclease, putative	177	76	73.62	78.13	75.24
GL50803_9909	Pyruvate, phosphate dikinase	361	335	66.94	63.44	65.795
GL50803_1345	Ribosomal protein L10a	432	414	52.47	56.38	54.68
GL50803_23004	hypothetical protein	125	139	51.54	47.14	49.815
GL50803_14859	Protein 21.1	164	128	73.075	67.41	69.265
GL50803_100864	Vacuolar protein sorting 26, putative	139	100	73.04	69.625	71.14
GL50803_16380	Cathepsin L precursor	118	60	70.305	65.355	67.965
GL50803_9115	Glucose-6-phosphate isomerase	117	86	67.11	67.925	67.38
GL50803_5643	Kinase	52	30	82.135	70.74	76.735
GL50803_7766	Ribosomal protein SA	499	407	61.17	63.22	62.12
GL50803_40224	MDR protein-like protein	104	46	85.225	79.955	84.355
GL50803_7796	Alpha-2 giardin	231	335	70.54	71.46	70.665
GL50803_134711	VSP, putative	1902	152	66.4	59.895	66.015
GL50803_9779	UPL-1	661	438	67.43	64.14	65.6
GL50803_14171	Ribosomal protein L37	441	381	55.77	56	55.93
GL50803_16588	hypothetical protein	602	789	50.66	51.22	51.04
GL50803_8896	hypothetical protein	8	10	56	71.57	62.76
GL50803_8468	hypothetical protein	19	12	83.09	81.455	83.09
GL50803_112304	Elongation factor 1-alpha	734	832	62.15	61.49	61.93
GL50803_15605	hypothetical protein	26	19	69.03	58.04	65.61
GL50803_33769	NADH oxidase lateral transfer candidate	508	452	69.115	60.6	64.24
GL50803_32730	hypothetical protein	33	10	77.42	46.005	70.3
GL50803_10367	Ribosomal protein S24	431	418	51.73	54.605	52.69
GL50803_12216	Vacuolar ATP synthase subunit B	95	90	71.04	66.51	68.36
GL50803_8055	hypothetical protein	102	125	82.46	74.6	77.42
GL50803_4447	hypothetical protein	62	37	70.12	70.5	70.37
GL50803_6262	Kinesin-3	18	9	63.1	83.15	69.79
GL50803_16766	Lysyl-tRNA synthetase	59	50	69.75	63.825	63.92
GL50803_7870	Ribosomal protein L23A	353	395	63.73	58.25	60.825
GL50803_14521	Peroxiredoxin 1	1676	939	65.805	64.72	65.37
GL50803_14206	Protein 21.1	9	2	63.86	57.33	63.86
GL50803_7999	Ribosomal protein S3	437	322	53.54	56.31	54.83
GL50803_27059	Proteasome subunit beta type 7 precursor	64	40	66.62	64.105	65.765
GL50803_7046	hypothetical protein	34	28	63.58	66.405	63.58
GL50803_113304	VSP	454	24	65.025	57.375	64.86
GL50803_12229	hypothetical protein	15	7	57.37	57.43	57.4
GL50803_91919	TCP-1 chaperonin subunit alpha	61	62	62.32	69.445	65.79
GL50803_40244	P24, putative	29	19	65.31	62.33	63.82
GL50803_16867	AAA family ATPase	117	103	67.64	73.47	71.775
GL50803_86676	Delta giardin	193	226	63.36	64.13	63.58
GL50803_2509	hypothetical protein	6	9	66.22	80.92	77.83
GL50803_5010	Ser/Thr phosphatase PP2A-2 catalytic subunit	58	19	64.88	74.67	66.36
GL50803_17063	Pyruvate-flavodoxin oxidoreductase	677	133	64.72	60.89	64.135
GL50803_16387	Ribosomal protein L18a	382	370	56.965	55.175	56.28
GL50803_16894	hypothetical protein	19	8	78.74	52.895	74.39
GL50803_10330	Tenascin precursor	443	200	76.25	74.185	75.67
GL50803_12244	hypothetical protein	17	3	76.15	57.04	68.77
GL50803_31591	hypothetical protein	81	84	52.22	50.51	51.97
GL50803_13272	hypothetical protein	164	96	68.78	74.75	70.675
GL50803_14622	Ribosomal protein L13	480	477	52.63	53.3	53.09
GL50803_17053	Protein 21.1	156	129	69.185	66.81	68.39
GL50803_8118	Ribosomal protein S2	669	407	55.79	54.97	55.5
GL50803_9780	hypothetical protein	249	154	56.53	60.35	58.36
GL50803_16916	hypothetical protein	264	68	66.48	62.155	64.14
GL50803_91348	Purine nucleoside phosphorylase lateral transfer candidate	27	15	68.48	76.77	70.4
GL50803_91480	STU2-like protein	38	15	75.405	63.24	69.09
GL50803_13000	Vacuolar ATP synthase subunit d	38	17	66.175	63.86	65.65
GL50803_134710	VSP	2707	478	66.6	64.075	66.29
GL50803_8394	hypothetical protein	99	90	55.23	58.07	55.33
GL50803_34093	hypothetical protein	174	129	49.215	51.06	50.14
GL50803_135001	Histone H4	177	173	68.79	61.3	64.995
GL50803_10196	hypothetical protein	65	105	68	58.44	61.02
GL50803_10780	Ribosomal protein S27	435	433	56.71	57.14	57.075
GL50803_23496	RNA polymerase AI large subunit	12	6	81.135	59.59	70.135
GL50803_6469	hypothetical protein	47	38	71.71	73.875	73.31
GL50803_89112	MCM5	18	23	57.37	69.81	66.62
GL50803_14983	Cathepsin L precursor	113	59	64.45	73.3	69.91
GL50803_16368	Ribosomal protein L31B	571	510	49.69	54.87	52.1
GL50803_16343	Median body protein	88	83	64.11	57.62	63.32
GL50803_10813	hypothetical protein	23	9	70.17	87.25	72.82
GL50803_17364	Ribosomal protein S26	352	283	61.395	62.16	61.81
GL50803_101380	VSP	16	4	66.005	50.54	64.89
GL50803_5883	hypothetical protein	101	116	72.66	68.98	71.25
GL50803_37578	hypothetical protein	4	9	62.745	56.64	57.3
GL50803_3593	Alcohol dehydrogenase lateral transfer candidate	227	227	73	62.5	68.225
GL50803_12095	Kinase, NEK-frag	10	5	82.74	83.11	83.11
GL50803_14364	Kinase, CAMK CAMKL	45	24	62.25	56.73	59.24
GL50803_6135	Ribosomal protein S17	407	410	52.87	55.09	53.92
GL50803_14256	Histone H2A	377	295	66.96	65.21	66.84
GL50803_19003	Ribosomal protein L24A	396	411	54.735	54.03	54.53
GL50803_13109	RabA	10	15	75.455	66.19	68.31
GL50803_102034	Kinase, NEK-frag	36	23	68.545	78.19	73.68
GL50803_10311	Ornithine carbamoyltransferase	2804	2675	61.875	65.52	63.56
GL50803_16750	hypothetical protein	11	4	86.75	70.86	86.75
GL50803_16779	Cathepsin B precursor	998	303	77.275	73.78	76.36
GL50803_10232	hypothetical protein	24	15	82.665	75.12	78.17
GL50803_6430	14-3-3 protein	883	939	65.78	65.83	65.81
GL50803_14285	Malic enzyme	138	65	77.58	74.62	76.78
GL50803_17055	Spindle pole protein, putative	113	39	68.93	65.24	68.805
GL50803_41472	VSP	696	23	66.185	65.19	66.12
GL50803_2013	Glutaredoxin-related protein	28	25	78.795	74.88	76.35
GL50803_17090	Giardia trophozoite antigen GTA-1	197	383	62.2	56.17	58
GL50803_14699	Ribosomal protein S23	482	374	57.875	57.015	57.525
GL50803_11078	unspecified product	23	11	80.96	77.89	79.425
GL50803_14321	Ribosomal protein L30	359	332	55.64	58.685	57.29
GL50803_16044	hypothetical protein	464	459	61.91	56.98	59.35
GL50803_6184	Branched-chain amino acid aminotransferase lateral transfer candidate	201	166	58.1	60.505	59.06
GL50803_5947	Ribosomal protein L35a	404	398	65.835	64.395	64.965
GL50803_114609	Pyruvate-flavodoxin oxidoreductase	806	237	67.24	65.21	66.96
GL50803_15307	Nitroreductase family protein	8	17	43.54	68.03	61.68
GL50803_10919	Ribosomal protein S10B	331	362	56.2	62.235	60.76
GL50803_14373	Dynamin	334	265	63.88	69.79	66.37
GL50803_16468	Cathepsin B precursor	301	142	69.69	64.91	67.23
GL50803_8172	Dynein heavy chain	443	138	91.19	98.855	92.52
GL50803_9413	Protein disulfide isomerase PDI2	267	249	62.93	61.54	62.46
GL50803_112867	VSP	130	6	67.5	71.56	67.56
GL50803_112432	High cysteine membrane protein Group 5	18	10	100.925	97.95	100.375
GL50803_103709	hypothetical protein	65	50	67.08	67.07	67.08
GL50803_7600	hypothetical protein	4	6	78.57	97.955	91.12
GL50803_4507	CTP synthase/UTP-ammonia lyase	22	17	68.16	76.8	74.21
GL50803_113450	VSP with INR	63	3	74.07	80.9	74.085
GL50803_4410	SALP-1	242	239	62.545	63.67	63.48
GL50803_17411	TCP-1 chaperonin subunit gamma	62	45	55.9	55.78	55.78
GL50803_8592	Tubulin tyrosine ligase	30	12	61.545	81.605	62.825
GL50803_4558	Deoxyguanosine kinase/deoxyadenosine kinase subunit, putative	46	24	70.925	69.15	69.15
GL50803_114815	Tenascin precursor	236	103	66.245	71.04	67.73
GL50803_3291	hypothetical protein	24	20	71.115	61.75	65.455
GL50803_96818	hypothetical protein	149	55	78.76	74.91	77.78
GL50803_16940	hypothetical protein	26	8	92.21	56.265	85.81
GL50803_8920	Zinc finger domain protein	10	5	82.68	76.12	78.32
GL50803_97219	Fibrillarin-like pre-rRNA processing protein Narcisi et al	67	100	56.93	57.5	57.16
GL50803_8917	Mu adaptin	96	94	61.83	60.65	60.65
GL50803_10521	Arginyl-tRNA synthetase	167	75	70.08	79.27	74.3
GL50803_16310	Ribosomal protein L27a	721	662	58.12	60.295	59.42
GL50803_9045	hypothetical protein	48	27	54.96	66.07	60.67
GL50803_r0021	28S ribosomal RNA	14133	9169	9.14	8.36	8.84
GL50803_137717	VSP	159	NA	81.6	NA	81.6
GL50803_15101	Alpha-17 giardin	24	15	58.295	78.85	66.75
GL50803_113038	hypothetical protein	81	24	60.5	70	62.96
GL50803_16492	hypothetical protein	19	4	68.96	68.245	68.96
GL50803_136021	Beta tubulin	308	376	56.445	54.79	55.655
GL50803_5517	Ribosomal protein L37a	747	531	57.86	61	59.45
GL50803_6242	Translationally controlled tumor protein-like protein	156	232	70.1	66.215	67.27
GL50803_10843	Thymus-specific serine protease precursor	91	49	60.25	65.26	61.06
GL50803_11884	hypothetical protein	33	43	64.61	70.46	64.93
GL50803_26199	Kinase, NEK	43	17	69.52	60.26	65.76
GL50803_4653	Serpin 1	68	50	68.46	58.415	63.655
GL50803_16652	Ribosomal protein S13	618	522	55.94	59.445	57.61
GL50803_15106	Importin beta-3 subunit	111	61	64.23	69.79	66.075
GL50803_14614	Eukaryotic translation initiation factor 5A	542	522	56.595	57.81	57.48
GL50803_10822	WD-40 repeat protein family	122	116	66.675	59.73	64.365
GL50803_13809	hypothetical protein	13	4	69.3	52.39	69.3
GL50803_8725	hypothetical protein	19	21	87.94	61.74	80.35
GL50803_17312	hypothetical protein	12	11	77.14	59.78	74.92
GL50803_10255	Translation initiation factor eIF-4A, putative	205	233	66.5	63.33	65.365
GL50803_8682	Glucose-6-phosphate 1-dehydrogenase	44	37	74.68	63.29	70.58
GL50803_93358	Alcohol dehydrogenase	455	272	72.12	67.33	70.66
GL50803_11043	Fructose-bisphosphate aldolase	680	529	65.855	68.63	67.32
GL50803_95162	Tenascin-like	553	224	63.67	63.02	63.45
GL50803_114623	hypothetical protein	148	85	77.4	77.04	77.18
GL50803_112079	Alpha-tubulin	789	652	65.76	66.795	66
GL50803_101594	CCAAT-box-binding transcription factor	9	7	52.68	49.87	51.275
GL50803_6680	Kinase, NEK	21	22	64.7	61.115	62.12
GL50803_7397	hypothetical protein	4	7	64.885	89.75	80.96
GL50803_15215	Phosphatase	69	71	72.37	70.26	71.095
GL50803_13350	Alcohol dehydrogenase lateral transfer candidate	57	45	75.54	69.96	74.375
GL50803_7962	20S proteasome alpha subunit 6	43	18	74.44	75.295	74.44
GL50803_93938	Triosephosphate isomerase, cytosolic	102	131	62.935	55.47	56
GL50803_13575	Dynein light chain	9	33	74.16	63.73	69.515
GL50803_15445	hypothetical protein	17	20	67.17	86.765	75.96
GL50803_14586	VSP with INR	707	47	61.07	51.69	60.71
GL50803_2098	ATP-dependent RNA helicase p54, putative	54	34	90.83	87.12	89.78
GL50803_11165	Protein 21.1	45	21	70.85	73.27	72.06
GL50803_22268	hypothetical protein	12	16	66.23	66.455	66.23
GL50803_101291	Beta tubulin	1037	999	63.27	62.36	62.9
GL50803_11540	Hexose transporter	542	80	73.5	74.92	73.54
GL50803_8360	Acid sphingomyelinase-like phosphodiesterase 3b precursor	63	34	62.25	58.1	62
GL50803_39483	Ribosomal protein S29A	41	45	53.81	48.38	52.16
GL50803_26497	Hypothetical protein	30	37	66.28	66.84	66.84
GL50803_15551	Ribosomal protein S18	402	454	66.825	66.735	66.82
GL50803_35998	hypothetical protein	14	5	90.685	102.52	97.57
GL50803_19436	Ribosomal protein L7	630	518	58.79	58.59	58.715
GL50803_114787	Alpha-7.3 giardin	472	599	62.075	60.88	61.46
GL50803_12035	hypothetical protein	79	34	75.41	69.91	72.64
GL50803_8001	Ribosomal protein L15	515	416	60.46	63.425	61.28
GL50803_14641	Transducin	44	10	62.175	55.78	61.47
GL50803_3470	ABC transporter family protein	16	8	88.24	108.09	95.58
GL50803_112103	Arginine deiminase	585	951	68.68	70.25	69.76
GL50803_2732	Hypothetical protein	78	45	72.135	64.78	71.29
GL50803_16745	Axoneme-associated protein GASP-180	146	90	63.86	62.635	63.86
GL50803_14049	Ribosomal protein L32	419	326	58	58.425	58.12
GL50803_101397	Protein 21.1	23	10	61.11	92.335	69.59
GL50803_122565	VSP	239	170	63.92	61.97	62.67
GL50803_103676	Alpha-tubulin	994	907	71.38	71.86	71.71
GL50803_11521	VSP	296	16	63.68	62.41	63.68
GL50803_16453	Carbamate kinase	574	1326	66.275	63.245	64.215
GL50803_16636	Rab2b	70	61	66.535	67	67
GL50803_122564	VSP	25	4	62.78	42.78	62.37
GL50803_2622	Phosphatidylinositol-4-phosphate 5-kinase, putative	40	55	66.78	59.37	64
GL50803_14091	Ribosomal protein L14	494	443	52.325	54.13	52.92
GL50803_8741	Dipeptidyl-peptidase I precursor	75	56	59.15	63.33	61.22
GL50803_22291	hypothetical protein	110	74	65.055	68.925	66.745
GL50803_16160	Cathepsin B precursor	367	108	73.7	66.025	72.68
GL50803_16640	hypothetical protein	63	46	82.22	84.06	82.22
GL50803_12999	hypothetical protein	72	58	66.19	58.375	63.18
GL50803_15260	Ribosomal protein S15	499	517	54.32	54.52	54.325
GL50803_14800	Protein 21.1	42	37	63.115	58.75	61.9
GL50803_11434	20S proteasome alpha subunit 2	36	23	77.685	67.76	73.38
GL50803_137714	VSP presumed INR	934	3	64.87	57.67	64.87
GL50803_10612	Phosphotyrosyl phosphatase activator protein, putative	55	27	78.12	68.59	74.335
GL50803_8228	DNA-dependent ATPase, putative	22	9	74.51	73.97	73.97
GL50803_114671	Protein 21.1	165	82	62.41	60.11	60.61
GL50803_113553	Kinase, NEK	134	117	68.21	64.96	66.57
GL50803_16318	High cysteine membrane protein Group 1	81	22	73.74	66.07	73.27
GL50803_6330	hypothetical protein	88	116	59.135	56.56	57.805
GL50803_3062	hypothetical protein	35	25	81.65	64.88	70.21
GL50803_12950	Ubiquitin-conjugating enzyme E2-17 kDa	28	23	72.97	57.34	60.64
GL50803_15251	hypothetical protein	63	79	65.92	69.19	67.345
GL50803_3042	Hybrid cluster protein lateral transfer candidate	133	89	73.11	63	68.95
GL50803_26269	unspecified product	15	5	82.58	88.1	82.99
GL50803_115830	VSP	204	8	61.32	63.895	61.32
GL50803_7204	hypothetical protein	106	172	65.08	59.23	59.815
GL50803_7261	Phosphatidylinositol-4-phosphate 5-kinase, putative	57	28	54.72	60.99	58.48
GL50803_7791	hypothetical protein	11	3	54.62	85.81	64.335
GL50803_21628	hypothetical protein	510	368	62.28	64.67	62.965
GL50803_5593	Ribosomal protein L11	122	102	60.67	62.05	61.21
GL50803_27925	Protein 21.1	256	213	64.985	60.63	63.12
GL50803_17536	UsoAp	15	9	69.43	66.69	68.06
GL50803_17395	Ribosomal protein L5	608	549	51.41	53.87	52.82
GL50803_14168	Amino acid transporter system N2, putative	40	31	75.46	66.18	72.56
GL50803_111987	hypothetical protein	101	91	57.38	58.52	58.225
GL50803_23876	hypothetical protein	27	40	64.03	75.8	67.89
GL50803_10162	hypothetical protein	36	13	79.06	74	75.24
GL50803_15427	Giardia trophozoite antigen GTA-2	393	329	64.42	62.54	63.295
GL50803_3036	RNA polymerase II subunit Rpb11	33	21	60.43	62.04	61.255
GL50803_5435	Cyst wall protein 2	93	67	76.24	70.54	73.41
GL50803_10881	hypothetical protein	51	31	70.86	62.68	69.515
GL50803_2777	hypothetical protein	10	7	72.27	83.12	73.54
GL50803_15410	Ser/Thr protein kinase	86	156	59.48	61.945	61.49
GL50803_16354	Protein 21.1	15	7	71.17	59.04	69.64
GL50803_21498	Serine/threonine protein phosphatase 5	23	14	75.17	70.245	72.37
GL50803_7532	Vacuolar ATP synthase catalytic subunit A	120	88	69.27	64.355	67.84
GL50803_8426	hypothetical protein	33	18	67.32	59.165	65.19
GL50803_15495	hypothetical protein	38	23	72.72	68.31	71.85
GL50803_6427	Major facilitator family transporter	43	18	66.77	70	66.77
GL50803_16550	hypothetical protein	32	32	77.98	65.665	72.19
GL50803_11950	Ribosomal protein L18	465	514	53.93	53.735	53.79
GL50803_13608	Acetyl-CoA synthetase	245	205	70.76	65.46	68.57
GL50803_115742	VSP	19	3	80.08	122.46	80.365
GL50803_11118	Enolase	567	521	73.74	74.68	74.32
GL50803_34684	DEAD box RNA helicase Vasa	32	18	64.5	77.16	66.825
GL50803_27266	[2Fe-2S] ferredoxin	59	53	80.55	72.87	78.43
GL50803_9058	hypothetical protein	19	5	65.55	66.15	65.85
GL50803_102444	Protein 21.1	131	112	52.63	64.095	59.24
GL50803_118786	VSP, putative	157	5	63.55	28.46	63.005
GL50803_92739	ATP-dependent RNA helicase A	25	6	74.52	80.525	75.45
GL50803_17304	Alpha adaptin	80	59	73.575	72.19	73.19
GL50803_17014	Nuclear ATP/GTP-binding protein	5	6	56.09	67.76	56.09
GL50803_137612	VSP	135	146	72	72.135	72.1
GL50803_9848	Dynein light chain	680	818	62.93	65.07	64.05
GL50803_3589	Ribosome biogenesis protein Brix	16	18	69.455	46.865	53.46
GL50803_17150	NADPH oxidoreductase, putative	152	103	63.41	67.11	65.87
GL50803_11755	hypothetical protein	31	32	68.41	64.25	67.56
GL50803_8528	hypothetical protein	120	98	65.705	65.765	65.75
GL50803_12102	Elongation factor 1-gamma	425	435	69.38	64.68	66.52
GL50803_5142	Kinase, NEK	11	6	88.6	84.2	88.6
GL50803_33917	unspecified product	5	6	60.08	87.315	77.18
GL50803_6917	hypothetical protein	103	51	68	65.61	66.73
GL50803_5919	Cation efflux family protein	16	7	84.575	81.11	84.19
GL50803_13561	Translation elongation factor	408	515	64.11	62.62	63.06
GL50803_16328	DRAP deaminase	12	14	57.795	64.23	59.255
GL50803_8444	MDR-type permease	239	99	68.08	68.03	68.055
GL50803_32102	unspecified product	13	25	84.33	77.82	77.945
GL50803_8560	hypothetical protein	114	90	61.105	61.1	61.1
GL50803_17104	hypothetical protein	9	3	66.93	101.46	70.445
GL50803_15476	Protein 21.1	11	6	93.43	69.48	85.7
GL50803_137618	VSP	186	100	71.63	70.785	70.995
GL50803_9079	ERP2	27	19	59.83	68.29	63.855
GL50803_9896	hypothetical protein	6	8	81.035	65.395	67.48
GL50803_113143	Lipopolysaccharide-responsive and beige-like anchor protein	18	6	74.895	107.26	76.85
GL50803_112112	hypothetical protein	15	11	71.67	74.27	73.79
GL50803_16833	Tenascin-like	215	74	71	68.42	70.75
GL50803_7747	hypothetical protein	16	13	68.38	84.31	70.07
GL50803_32838	hypothetical protein	15	13	71.93	57	67.765
GL50803_17227	DinF protein	21	14	61.31	64.6	61.31
GL50803_6372	High cysteine protein	241	84	64.21	63.29	64.18
GL50803_98760	hypothetical protein	251	87	77	80.55	77.78
GL50803_16363	Alanine aminotransferase, putative	54	52	66.96	63.725	64.905
GL50803_21803	hypothetical protein	17	21	50.16	75.4	75.235
GL50803_17105	IFT complex B	45	18	57	78.035	61.92
GL50803_11359	Ribosomal protein S4	481	451	62.81	62.65	62.67
GL50803_17060	Protein 21.1	159	133	70.81	60.73	67.695
GL50803_91056	Aspartate aminotransferase, cytoplasmic	105	117	71.19	68.32	68.625
GL50803_20195	5-methylthioadenosine nucleosidase, S-adenosylhomocysteine nucleosidase	53	45	63.66	58.03	61.69
GL50803_14606	Translation initiation factor 6	23	7	70.19	46.2	67.72
GL50803_113024	VSP	119	25	68.39	70.38	68.455
GL50803_113512	High cysteine membrane protein Group 6	52	12	80.69	82.595	80.69
GL50803_17570	Elongation factor 2	419	238	68.09	67.395	67.88
GL50803_11895	hypothetical protein	14	5	82.615	34.52	69.41
GL50803_15409	Kinase, NEK	834	550	57.46	59.865	58.295
GL50803_13584	hypothetical protein	83	142	74.74	69.225	72.34
GL50803_17230	Gamma giardin	445	693	66.07	60.04	62.875
GL50803_34179	hypothetical protein	13	7	61.03	50.17	56.63
GL50803_6334	hypothetical protein	10	14	65.61	65.435	65.435
GL50803_10450	FKBP-type peptidyl-prolyl cis-trans isomerase	63	135	59.96	58	58.89
GL50803_10623	Phosphoenolpyruvate carboxykinase	207	103	66.96	65.46	65.855
GL50803_40016	Protein 21.1	27	16	65.08	68.335	65.85
GL50803_21603	Protein 21.1	12	12	66.445	47.055	61.77
GL50803_9719	NADH oxidase	224	90	65.26	60.84	64.19
GL50803_16824	Kinase, NEK	170	78	62.05	65.655	62.925
GL50803_14938	Ribosomal protein L12	587	445	55.13	56.54	55.815
GL50803_5744	Sec61-alpha	137	90	68.04	66.28	67.07
GL50803_5188	Protein 21.1	40	42	59.755	62.825	61.335
GL50803_31833	hypothetical protein	18	8	72.585	52.72	69.52
GL50803_16501	VSP with INR	348	8	62.105	70.62	62.41
GL50803_17149	GTP-binding protein	30	17	62.705	76.75	71.41
GL50803_8217	Uridine kinase	48	48	78.915	82.645	80.09
GL50803_12105	hypothetical protein	20	22	66.18	71	71
GL50803_28477	hypothetical protein	216	177	57.07	57.97	57.43
GL50803_28620	hypothetical protein	8	4	77.595	81.78	81.78
GL50803_16353	hypothetical protein	49	36	73.5	67.42	71.63
GL50803_7188	hypothetical protein	71	58	67.08	56.3	61.55
GL50803_100955	Mitotic spindle checkpoint protein MAD2	47	97	71.58	69.29	70.445
GL50803_4538	hypothetical protein	18	12	56.235	65.315	62.19
GL50803_137708	VSP	137	5	61.07	91.9	62.37
GL50803_7126	hypothetical protein	14	8	69.64	72.685	70.73
GL50803_17112	U3 small nucleolar ribonucleoprotein protein IMP4, putative	10	8	69.52	61.675	64.675
GL50803_16653	hypothetical protein	152	90	65.185	65.05	65.105
GL50803_14967	hypothetical protein	14	1	66.54	27.77	66.12
GL50803_4977	Kinase, NEK-frag	14	12	76.34	77.06	76.79
GL50803_8496	Rac/Rho-like protein	89	103	66.38	64.62	65.075
GL50803_17000	Peptidyl-prolyl cis-trans isomerase B precursor	113	94	67.74	69.545	68.2
GL50803_104150	Kinase, PLK	20	22	76.58	67.02	67.705
GL50803_9861	hypothetical protein	319	490	59.81	58.645	58.85
GL50803_10829	Glucosamine-6-phosphate deaminase	23	24	68.52	57.135	63
GL50803_8462	Ribosomal protein L27	535	436	57.07	59.085	58.17
GL50803_8429	Minor histocompatibility antigen H13	45	16	67.62	79.27	68.65
GL50803_137641	TMP55	30	26	69.575	68.925	69.575
GL50803_103943	High cysteine protein	83	39	60.7	60.07	60.62
GL50803_8064	Protein disulfide isomerase PDI5	597	924	64.81	62.855	63.67
GL50803_5779	hypothetical protein	32	21	79.28	84.32	81.75
GL50803_101534	Kinase, NEK	165	141	66.96	61.27	63.81
GL50803_13273	Dynein light intermediate chain	30	25	69.465	59.62	62.92
GL50803_1713	Protein 21.1	30	42	59.55	62.125	60.785
GL50803_114776	NSF	44	19	83.21	67.92	74.71
GL50803_8044	Seven transmembrane protein 1	658	372	67.495	65.795	67.015
GL50803_22677	Nitroreductase Fd-NR2	110	127	59.635	60.83	60.27
GL50803_9030	Protein 21.1	274	223	62.17	59.93	61.29
GL50803_103992	VSP	322	40	66.565	62.115	66.28
GL50803_11953	Coatomer alpha subunit	38	13	73.7	75.92	75.92
GL50803_115797	VSP with INR	103	40	63.63	66.55	64.63
GL50803_15499	hypothetical protein	71	57	63.17	54.8	58.035
GL50803_37488	hypothetical protein	25	9	72.32	79.96	72.88
GL50803_15564	Cathepsin B precursor	101	24	72.12	77.69	72.65
GL50803_14993	Pyrophosphate-fructose 6-phosphate 1-phosphotransferase alpha subunit	107	100	65.65	67.835	66.28
GL50803_12223	Kinase, NAK	41	22	81.59	61.13	73.54
GL50803_17123	hypothetical protein	18	8	74.27	87.455	76.28
GL50803_112885	Adenine phosphoribosyltransferase	151	116	63.96	71.14	67.79
GL50803_137744	VSP	110	19	79.68	60.12	76.83
GL50803_14413	DNA-directed RNA polymerase RPB10	14	9	68.19	52.73	62.87
GL50803_8364	Thymidine kinase	23	28	70.27	68.375	69.72
GL50803_17350	hypothetical protein	54	16	65	61.655	65
GL50803_14212	Histone H3	458	354	62.785	62.165	62.495
GL50803_4912	Kinase, NEK	53	60	79.12	67.27	70.56
GL50803_17449	RIO1-like protein	9	6	71.5	69.375	70.48
GL50803_37426	hypothetical protein	9	2	90.28	120.355	90.71
GL50803_137620	VSP	28	23	71.21	75.83	74.16
GL50803_2107	hypothetical protein	83	84	75.82	76.02	75.82
GL50803_114192	Kinase, NEK	29	14	58.69	74.73	62.7
GL50803_101138	Dynein heavy chain	15	10	80.32	92.035	82.2
GL50803_115478	hypothetical protein	26	25	65.855	56.6	57.21
GL50803_14737	hypothetical protein	12	3	53.66	51.29	51.29
GL50803_115201	unspecified product	19	6	80.37	71.78	79.81
GL50803_13452	Regulator of nonsense transcripts 1-like protein	12	8	86.955	76.075	86.75
GL50803_15383	Peroxiredoxin 1	173	165	70.52	70.93	70.82
GL50803_40817	Actin related protein	70	52	67.365	63.72	65.62
GL50803_7843	hypothetical protein	115	115	63.81	62.68	62.8
GL50803_36069	Ribosomal protein L34	517	442	53.08	53.81	53.42
GL50803_10569	hypothetical protein	4	11	47.93	58.68	54.92
GL50803_95023	hypothetical protein	6	7	68.135	60.27	60.28
GL50803_14670	Protein disulfide isomerase PDI3	392	560	63.05	56.895	60.02
GL50803_7110	Ubiquitin	388	350	59.08	56.015	57.7
GL50803_10358	A-type flavoprotein lateral transfer candidate	348	143	71.825	69.37	71.45
GL50803_114777	hypothetical protein	188	70	85.725	91.315	86.435
GL50803_102455	Kinesin-6	14	6	78.575	96.48	79.385
GL50803_15538	Eukaryotic translation initiation factor 5	56	40	64.98	67.43	67.045
GL50803_17327	Xaa-Pro dipeptidase	312	356	63.71	62.98	63.1
GL50803_15474	hypothetical protein	22	13	53.085	58.56	56.23
GL50803_15869	GTP-binding nuclear protein RAN/TC4	309	238	63	61.32	62.38
GL50803_41212	hypothetical protein	169	106	64.64	65.46	65
GL50803_8359	hypothetical protein	15	5	67.93	71.61	69.215
GL50803_6289	FixW protein, putative	130	116	73.02	67.65	69.82
GL50803_103373	Alpha-7.1 giardin	88	105	61.725	65.61	65.07
GL50803_96570	hypothetical protein	29	11	73.42	59.3	70.105
GL50803_8987	hypothetical protein	7	6	51.85	80.175	73.85
GL50803_14046	hypothetical protein	46	24	67.11	66.59	66.59
GL50803_29140	hypothetical protein	72	42	57.145	59.125	58.165
GL50803_17046	Protein 21.1	38	34	69.455	54.975	64.68
GL50803_23235	Axoneme-associated protein GASP-180	14	5	55.13	73.39	57.7
GL50803_15338	Kinase, NEK-frag	10	10	85.03	83.565	83.565
GL50803_11390	Kinase, NEK	221	131	71.35	70.65	70.955
GL50803_33862	Ribosomal protein S12	458	469	53.705	54.9	54.6
GL50803_9829	CDP-diacylglycerol-inositol 3-phosphatidyltransferase	16	13	77.09	91.42	79.87
GL50803_10016	hypothetical protein	41	39	81	59.95	63.265
GL50803_5809	hypothetical protein	52	13	70.335	75.92	72.31
GL50803_137747	hypothetical protein	46	5	71.17	62.73	71.07
GL50803_12091	Macrophage migration inhibitory factor	87	120	64.79	53.75	58.71
GL50803_88765	Cytosolic HSP70	91	420	60	61.425	61.35
GL50803_115831	VSP with INR	196	2	61.705	66.465	61.98
GL50803_16507	hypothetical protein	125	71	71.85	67.28	70.44
GL50803_87261	hypothetical protein	103	134	58.26	67.24	64.58
GL50803_17368	Kinase, ULK	29	10	81.62	87.185	85.37
GL50803_11354	hypothetical protein	276	243	74.6	75.79	75.19
GL50803_9704	Transketolase	148	111	80.68	82.96	81.92
GL50803_5890	hypothetical protein	40	30	54.37	64.7	59.96
GL50803_15398	Chaperone protein dnaJ	55	54	74.62	73.165	73.19
GL50803_16298	hypothetical protein	525	455	55.32	53.29	54.14
GL50803_15062	hypothetical protein	20	16	96.445	81.55	81.78
GL50803_16322	Neurogenic locus Notch protein precursor	339	171	73	77.58	74.83
GL50803_16639	Histone acetyltransferase Elp3	16	9	68.33	68.8	68.8
GL50803_6283	hypothetical protein	54	36	82.14	72.645	77.345
GL50803_6725	hypothetical protein	20	7	77.635	55.27	74.75
GL50803_112341	hypothetical protein	38	38	67.05	54.19	57.015
GL50803_9348	Glutaminyl-tRNA synthetase	20	17	80.605	68.38	69.92
GL50803_94440	Dynein heavy chain	40	16	68.235	59.6	64.14
GL50803_16272	Kinase, NEK	19	21	47.44	66.54	65.225
GL50803_4652	Ribosomal protein S16	479	523	54.23	55.29	54.8
GL50803_103944	Kinase, NEK	6	7	49.02	86.04	75
GL50803_39210	hypothetical protein	5	10	91.74	72.87	81.15
GL50803_31998	hypothetical protein	16	13	64.735	83.14	75.08
GL50803_15317	High cysteine membrane protein Group 1	459	70	74.43	83.2	75.29
GL50803_3570	Ribosomal protein S28	144	159	49.07	54.43	51.74
GL50803_9810	Ribosomal protein L44	373	349	57.22	55.56	56.56
GL50803_119706	VSP	32	3	75.215	65.84	75.06
GL50803_97052	hypothetical protein	32	36	76.7	84.705	83.76
GL50803_11301	Nucleoside diphosphate kinase	165	161	65.07	65.58	65.315
GL50803_16522	hypothetical protein	131	95	60.64	55.75	57.965
GL50803_10055	DNA-directed RNA polymerase subunit D	8	10	50.66	72.01	62.005
GL50803_137712	hypothetical protein	55	20	69	71.86	70.93
GL50803_6171	hypothetical protein	306	261	52.21	54.39	53.5
GL50803_6724	Protein F17L21.10	73	89	71.22	73.42	73.14
GL50803_137695	Kinase, CMGC DYRK	33	19	63.79	59.74	61.94
GL50803_88960	hypothetical protein	104	69	61.165	66.04	62.73
GL50803_9355	hypothetical protein	139	110	66	63.99	65.04
GL50803_90872	Phosphoglycerate kinase	170	197	65.37	65.56	65.56
GL50803_17590	hypothetical protein	21	20	71	74.54	74
GL50803_15888	hypothetical protein	13	11	77.92	92.81	78.645
GL50803_137722	VSP	45	2	74.69	55.345	74.69
GL50803_13103	hypothetical protein	66	58	64.15	61.15	63.695
GL50803_114674	Hypothetical protein	267	4	67.84	60.035	67.68
GL50803_137707	VSP	141	2	62.59	72.595	62.59
GL50803_91643	26S proteasome regulatory subunit, putative	37	27	62.85	68.87	64.62
GL50803_113836	High cysteine membrane protein EGF-like	125	42	74.64	71.575	74.52
GL50803_5375	Kinase, NEK	83	68	68	65.595	67.39
GL50803_114014	hypothetical protein	30	11	57.08	56.3	56.48
GL50803_10698	Phosphorylase B kinase gamma catalytic chain	44	38	66.095	69.465	68.16
GL50803_7878	Ribosomal protein S14	409	466	61.3	59.8	60.8
GL50803_18470	Vacuolar proton-ATPase subunit, putative	68	54	79.98	75.835	76.71
GL50803_86683	26S protease regulatory subunit 7	26	12	66.42	47.845	64.22
GL50803_17172	hypothetical protein	5	8	76.6	89.29	80.93
GL50803_97767	unspecified product	24	20	75.62	95.78	84.015
GL50803_137698	Sec13	18	9	63.61	61.74	63.14
GL50803_17403	hypothetical protein	21	9	80.89	60.44	77.31
GL50803_4606	Methionyl-tRNA synthetase	134	96	68.27	66.77	67.715
GL50803_17278	hypothetical protein	23	28	70.08	68.585	68.94
GL50803_92372	unspecified product	19	15	77	74.08	75.54
GL50803_8687	Tenascin precursor	282	53	84.055	93.28	85.3
GL50803_3206	Pyruvate kinase	109	72	70.08	75.09	71.75
GL50803_16414	hypothetical protein	12	11	87.5	70.23	76.87
GL50803_23497	unspecified product	23	44	56.92	59.14	57.93
GL50803_116477	VSP	280	13	64.39	76.15	64.89
GL50803_101765	VSP	319	319	64.62	63.82	64.405
GL50803_21622	hypothetical protein	17	10	77.61	90.545	84.58
GL50803_17362	hypothetical protein	26	5	75.545	83.67	80.42
GL50803_20551	hypothetical protein	19	27	58.31	61.26	59.015
GL50803_6139	hypothetical protein	32	12	71.125	83.73	72.63
GL50803_13524	Phosphatase	8	12	70.47	68.545	69.96
GL50803_17130	Protein 21.1	12	4	78.95	103.73	82.32
GL50803_15305	Hydroxyacylglutathione hydrolase	9	11	89.26	64.96	66.575
GL50803_24425	hypothetical protein	40	18	59.06	59.79	59.735
GL50803_13194	VSP AS8	29	8	51.79	63.27	54.26
GL50803_113284	hypothetical protein	100	86	53.95	61.6	58.99
GL50803_24662	L-serine dehydratase	61	40	67.37	74.345	70.85
GL50803_16996	hypothetical protein	24	29	49.255	59.08	55.3
GL50803_32778	Protein 21.1	307	188	66.27	62.485	64.65
GL50803_137716	Axoneme-associated protein GASP-180	584	173	57.17	57.46	57.2
GL50803_17296	hypothetical protein	27	8	81.58	90.515	84
GL50803_16717	hypothetical protein	105	125	69.31	65.67	66.195
GL50803_21118	Long chain fatty acid CoA ligase 5	95	48	81.96	88.715	83.24
GL50803_2750	hypothetical protein	26	21	79.35	73.1	76.71
GL50803_6666	hypothetical protein	30	10	73.115	66.39	70.525
GL50803_17151	NADPH oxidoreductase, putative	20	9	87.64	72.27	80.28
GL50803_16811	ZipA	28	15	68.53	65.96	65.96
GL50803_10167	Coiled-coil protein	79	56	62.96	59.375	61.25
GL50803_8978	4-alpha-glucanotransferase	54	23	67.96	70.73	69.37
GL50803_r0019	18S ribosomal RNA	284	113	12.595	14.65	12.92
GL50803_15035	Kinase, NEK-like	57	37	57	63.16	58.065
GL50803_17224	Alpha-SNAP, putative	57	45	62.12	66.07	65.66
GL50803_6133	Ribosomal protein L35	398	378	57.4	57.92	57.675
GL50803_92645	5' nucleotidase family protein	44	36	63.135	62.035	62.51
GL50803_114162	VSP	93	1	72.28	105.52	72.4
GL50803_37518	hypothetical protein	107	131	54.46	56.48	54.905
GL50803_137742	Kinase, NEK	19	3	74.6	85.54	75.64
GL50803_40592	VSP with INR	245	20	66.5	66.33	66.5
GL50803_105907	unspecified product	22	14	77.095	88.295	79.38
GL50803_12830	hypothetical protein	210	137	72.33	72.11	72.14
GL50803_41258	hypothetical protein	14	5	71.27	67.48	71.04
GL50803_5665	Ubiquitin/ribosomal protein CEP52	350	365	66.55	63.31	64.54
GL50803_112076	Kinase, CDC7	82	21	52.44	54.48	52.72
GL50803_15054	Kelch repeat-containing protein	41	29	58.48	58.27	58.375
GL50803_9008	Aldose reductase	54	17	59.54	58.79	58.79
GL50803_4149	hypothetical protein	24	16	70.425	52.495	65.635
GL50803_27836	Protein 21.1	13	7	92.82	79.34	86.68
GL50803_137733	Kinase, NEK	22	14	77.66	88.16	81.455
GL50803_12139	Protein 21.1	115	83	68.32	59.43	63.06
GL50803_88082	Coatomer beta subunit	23	10	66.17	76.085	68.07
GL50803_86934	Kinase, NEK	59	51	56.78	63	58.81
GL50803_37907	hypothetical protein	7	4	75.48	63.625	73.75
GL50803_3916	hypothetical protein	38	13	82.47	74.83	78.72
GL50803_17507	hypothetical protein	22	14	69.92	53.655	65.215
GL50803_9489	V-SNARE	51	45	77.66	67.37	72.08
GL50803_10091	Ribosomal protein L23	365	457	59.34	56	57.715
GL50803_4079	Protein phosphatase PP2A regulatory subunit B	26	24	76.065	64.8	74.515
GL50803_11763	hypothetical protein	9	17	84.33	72.22	76.405
GL50803_21444	Spindle pole protein, putative	29	43	60.55	63.04	61.485
GL50803_14434	Protein 21.1	60	30	62.35	63.375	62.845
GL50803_114829	hypothetical protein	7	3	59.81	40.59	49.245
GL50803_113130	hypothetical protein	33	22	73.44	59.29	67.96
GL50803_21321	High cysteine membrane protein Group 5	37	19	65.39	67.33	66.36
GL50803_15535	Deoxyhypusine synthase, putative	25	23	65.52	66.13	65.825
GL50803_12150	Alanine aminotransferase, putative	214	121	69.07	67.19	67.46
GL50803_14649	hypothetical protein	24	23	68.345	62.06	64.68
GL50803_r0025	18S ribosomal RNA	19	8	14.53	25.585	14.81
GL50803_7588	Serine/threonine protein phosphatase 7	105	80	62.17	73.675	68.65
GL50803_5603	Coatomer gamma subunit	31	22	67.05	73.535	73.11
GL50803_23888	FixW protein, putative	36	34	50.515	64.565	58.22
GL50803_3213	unspecified product	24	15	53.88	77.22	60.91
GL50803_113987	High cysteine membrane protein Group 3	74	21	68.885	53.59	68.16
GL50803_137604	VSP S8	35	5	68.3	62.85	67.415
GL50803_14926	Protein 21.1	94	78	66.89	60.625	63.46
GL50803_16936	High cysteine membrane protein EGF-like	29	12	68.4	44.87	64.46
GL50803_13539	hypothetical protein	66	23	54.7	69.26	58.23
GL50803_10038	Alpha-18 giardin	26	29	70.075	71.23	71.23
GL50803_16877	Zinc finger domain protein	32	34	69.225	67.08	67.63
GL50803_94463	hypothetical protein	196	113	69.615	71.06	69.78
GL50803_121046	Histone H2B	271	211	64.11	66.42	64.535
GL50803_10893	Kinase, NEK	10	14	71.33	78.155	73.025
GL50803_16265	Ribosomal protein S3a	437	471	57.62	54.59	55.71
GL50803_86761	LEK1	27	16	65.22	60.71	64.09
GL50803_14915	hypothetical protein	27	10	64.26	73.905	65.5
GL50803_93548	Phospholipase B	250	154	61.355	62.265	61.66
GL50803_101278	hypothetical protein	174	86	73.36	65.81	69.535
GL50803_16435	Protein 21.1	34	22	71.915	59.02	69.525
GL50803_101339	FKBP-type peptidyl-prolyl cis-trans isomerase	67	51	67.23	61.15	64.515
GL50803_7207	hypothetical protein	36	16	77.095	74.925	76.58
GL50803_14551	Alpha-6 giardin	139	175	60.71	63.47	62.655
GL50803_7799	Alpha-4 giardin	19	13	53.21	76.88	59.23
GL50803_103855	Vacuolar protein sorting 29	57	61	75.17	66.15	70.03
GL50803_11683	Alpha-3 giardin	174	143	66.38	66.84	66.6
GL50803_16715	hypothetical protein	7	3	45.96	73.48	54.32
GL50803_41942	High cysteine membrane protein Group 6	59	38	83.71	88.32	84.6
GL50803_7520	hypothetical protein	13	12	82.41	87.33	86.04
GL50803_11397	TCP-1 chaperonin subunit beta	54	35	64.95	61.68	62.55
GL50803_28954	hypothetical protein	7	6	56.62	60.16	56.62
GL50803_9912	Ribonuclease, putative	12	6	62.5	90.98	74.15
GL50803_10217	Cathepsin B precursor	101	60	67.53	66.11	67.53
GL50803_3032	Tryptophanyl-tRNA synthetase	30	22	47.72	59.935	51.41
GL50803_14963	hypothetical protein	19	17	53.89	63.41	57.29
GL50803_8048	hypothetical protein	58	42	75.35	77.765	76.035
GL50803_6439	hypothetical protein	14	16	71.025	63	69.58
GL50803_14960	hypothetical protein	19	7	74.36	53.48	62.585
GL50803_15097	Alpha-14 giardin	91	75	60.48	59.87	59.875
GL50803_6535	hypothetical protein	26	31	76.66	61.96	64.91
GL50803_15048	ATP-dependent RNA helicase-like protein	41	51	64.87	66.17	65.435
GL50803_7721	hypothetical protein	17	4	74.19	78.04	74.19
GL50803_21423	Beta adaptin	110	53	65.795	72.86	67.74
GL50803_4705	hypothetical protein	107	74	69.04	65.275	67.24
GL50803_5604	hypothetical protein	219	232	58.59	65.185	62.73
GL50803_7566	hypothetical protein	18	5	76.83	75.19	75.21
GL50803_5638	Cyst wall protein 1	114	99	64.155	61.16	61.82
GL50803_4644	hypothetical protein	22	10	78.83	73.225	75.92
GL50803_16404	hypothetical protein	79	52	63.61	74.45	66.68
GL50803_102023	Protein 21.1	22	21	58.795	75.13	61.46
GL50803_14681	Protein 21.1	9	5	77.58	76.69	77.135
GL50803_4849	Adenylate kinase	6	8	61.82	98.535	76.7
GL50803_96264	hypothetical protein	40	36	68.95	69.75	69.235
GL50803_16826	Kinase, NEK-frag	11	3	47.78	38.5	43.14
GL50803_25013	High cysteine protein	111	152	71.33	74.295	73.1
GL50803_86680	hypothetical protein	20	7	54.32	73.07	56.37
GL50803_5247	hypothetical protein	3	11	81.86	50.03	50.035
GL50803_11129	hypothetical protein	60	61	76.385	66.88	68.93
GL50803_29490	Copine I	41	46	83.9	81.28	83.5
GL50803_5661	RNA binding protein	11	9	65.57	77.96	69.285
GL50803_15144	RNA polymerase II subunit Rpb8	18	13	85.55	73.14	77.59
GL50803_6022	Ribosomal protein S20	47	39	53.59	51.67	51.725
GL50803_33721	hypothetical protein	11	8	60.65	59.16	60.65
GL50803_6185	hypothetical protein	157	90	59.15	62.675	60.54
GL50803_9117	CAMP-dependent protein kinase regulatory chain	43	35	70.54	61.44	66.825
GL50803_114119	Alpha-7.2 giardin	58	76	71.24	64.1	65.645
GL50803_113723	hypothetical protein	32	23	70.79	56.73	65.23
GL50803_103059	Dynein heavy chain	84	31	67.28	69.28	67.81
GL50803_10572	hypothetical protein	22	12	91.125	89.185	89.185
GL50803_17286	hypothetical protein	11	24	96.73	67.295	68.19
GL50803_13988	hypothetical protein	8	7	58.625	71.86	61.42
GL50803_136003	VSP	62	11	64.65	88.48	69.69
GL50803_11299	Amino acid transporter, putative	111	43	73.62	69.22	71.19
GL50803_7569	GTP-binding protein Sar1	50	78	69.18	66.075	67.15
GL50803_23800	hypothetical protein	8	7	71.975	54.87	63.62
GL50803_32097	hypothetical protein	7	4	91.96	91.94	91.96
GL50803_15397	Kinase, CMGC CDK	73	56	66.71	64.42	65.72
GL50803_6885	hypothetical protein	9	5	61.18	58.82	60
GL50803_10808	hypothetical protein	121	76	62.96	57.98	60.04
GL50803_40067	hypothetical protein	29	25	72.82	69.72	71.51
GL50803_89622	Mu adaptin	21	16	87.86	79.005	81.82
GL50803_8415	hypothetical protein	20	10	65.305	70.755	69.05
GL50803_4383	Protein 21.1	26	11	63.825	64.5	64.11
GL50803_113797	VSP with INR	69	25	66.68	76.2	68.07
GL50803_27696	hypothetical protein	29	19	69.08	60.6	66.775
GL50803_17091	Exosome complex exonuclease, putative	57	56	63.1	66.665	65.25
GL50803_16370	Transcriptional activator, putative	17	5	63.36	78.46	67.885
GL50803_11713	Prefoldin subunit 2	36	34	78.685	66.62	72.06
GL50803_114445	hypothetical protein	8	4	60.76	101.015	62.925
GL50803_8944	hypothetical protein	11	9	76.5	73.6	75.51
GL50803_6757	Pyrazinamidase/nicotinamidase	22	18	64.62	75.5	65.84
GL50803_2101	Cytidine deaminase	125	115	72.27	72.12	72.19
GL50803_10522	hypothetical protein	17	28	53.46	64.4	59.67
GL50803_8826	Glucokinase	255	199	77.27	79.58	78.695
GL50803_7244	hypothetical protein	154	209	69.905	68.85	69.17
GL50803_8842	ZPR1	26	13	71.14	51.42	65.88
GL50803_4627	hypothetical protein	33	24	71.5	70.465	71.5
GL50803_15218	WD-40 repeat protein	29	38	58.72	63.945	61.57
GL50803_12949	Proteasome subunit beta type 5 precursor	40	33	68.215	70.78	68.32
GL50803_5347	Myb 1-like protein	40	18	58.265	80.6	60.925
GL50803_10856	Alpha-snap	22	22	73.555	78.89	74.92
GL50803_29772	hypothetical protein	24	11	81.385	73.41	81.24
GL50803_6153	hypothetical protein	10	14	80.86	60.695	67.155
GL50803_7865	L-asparaginase	34	23	75.98	67.42	70.7
GL50803_2452	Ornithine cyclodeaminase	63	33	78.67	66.65	76.58
GL50803_16263	Sjogren's syndrome nuclear autoantigen 1-like protein	61	72	73.88	61.3	67.62
GL50803_8260	hypothetical protein	19	9	79.72	56.79	71.095
GL50803_16039	hypothetical protein	12	9	73.9	69.54	72.63
GL50803_9183	hypothetical protein	211	74	71.41	69.535	70.35
GL50803_7579	Kinase, NEK-frag	31	6	72.87	67.415	72.87
GL50803_89552	hypothetical protein	15	7	75.2	86.92	77.435
GL50803_7394	hypothetical protein	24	8	76.35	91.6	80.825
GL50803_6939	Dynein intermediate chain	26	19	56.48	62.35	57.84
GL50803_6317	hypothetical protein	16	4	74.225	73.61	74.225
GL50803_113622	Protein 21.1	61	40	72.64	55.915	58.56
GL50803_87446	ABC transporter family protein	50	56	72.2	81.255	77.98
GL50803_15192	hypothetical protein	11	4	65.87	59.105	64.55
GL50803_6000	Amino acid transporter family	11	8	60.33	53.18	56.29
GL50803_22855	hypothetical protein	94	68	60.525	67.265	62.605
GL50803_9478	Alpha mitochondrial protein peptidase like protein	22	20	71.225	91.545	83.525
GL50803_15297	Ribokinase	83	73	69.07	68.3	68.795
GL50803_10516	Leucine carboxyl methyltransferase	38	43	63.815	72.18	68.85
GL50803_8407	Aminoacyl-histidine dipeptidase	98	75	74.285	76.77	75.25
GL50803_15252	Ubiquitin-conjugating enzyme E2-17 kDa 3	125	146	70.2	64.98	68.88
GL50803_104232	hypothetical protein	20	8	66.915	72.265	66.915
GL50803_102438	Plasma membrane calcium-transporting ATPase 2	19	6	77.52	59.29	70.3
GL50803_7760	Sentrin	39	48	61.41	60.155	60.64
GL50803_8781	Yip paralog	56	36	78.7	69.735	73.255
GL50803_9270	Dual specificity protein phosphatase CDC14A	22	22	57.82	59.78	58.67
GL50803_86821	Protein 21.1	15	5	59.16	67.04	59.79
GL50803_13930	ARF3	98	77	53.215	56.14	55.1
GL50803_8446	hypothetical protein	18	9	88.6	76.96	85.85
GL50803_5942	Polyadenylate-binding protein, putative	185	126	63.41	51.79	57.97
GL50803_15832	Aminoacyl-histidine dipeptidase	77	75	77.11	65	74.06
GL50803_4946	Peptide methionine sulfoxide reductase msrA	34	16	58.935	77.44	68.38
GL50803_16424	hypothetical protein	96	87	68.145	66.62	66.69
GL50803_93294	hypothetical protein	33	24	70.04	70.955	70.04
GL50803_7789	ADP-ribosylation factor	290	202	73.06	71.585	72.34
GL50803_11486	20S proteasome alpha subunit 7	38	26	72.025	63.54	69.75
GL50803_7309	Syntaxin-like protein 1	22	17	49.815	49.86	49.86
GL50803_6377	hypothetical protein	35	7	75.32	62.04	72.1
GL50803_4950	hypothetical protein	20	13	79.675	75.29	77.44
GL50803_16443	Protein phosphatase 2A B' regulatory subunit Wdb1	24	26	64.21	67.23	65.945
GL50803_24537	Spindle pole protein, putative	50	41	64.63	68.74	67.22
GL50803_92223	ABC transporter family protein	36	23	77.065	80.36	78.04
GL50803_15213	hypothetical protein	33	16	60.92	58.305	59.77
GL50803_7444	Hypothetical protein	47	64	66.17	53.08	58.97
GL50803_103659	Zinc finger domain protein	27	5	90.17	57.57	82.595
GL50803_6498	unspecified product	28	6	87.885	85.055	87.885
GL50803_11342	hypothetical protein	34	50	64.475	60.315	61.715
GL50803_106300	unspecified product	12	6	69.095	61.96	67.365
GL50803_33281	hypothetical protein	7	6	95.85	60.855	89.04
GL50803_104173	Isoleucyl-tRNA synthetase	50	35	64.5	61.81	63.93
GL50803_101168	Protein 21.1	32	30	55.095	66.535	61.445
GL50803_8608	hypothetical protein	22	6	72.68	81.715	72.68
GL50803_16124	TCP-1 chaperonin subunit eta	40	32	72.23	69.235	69.62
GL50803_111911	hypothetical protein	6	7	60.625	64.54	62.97
GL50803_37093	VSP	16	4	65.855	57.695	64.235
GL50803_15004	NADPH oxidoreductase, putative	21	10	80.72	60.915	71.78
GL50803_8821	hypothetical protein	51	47	72	65.04	69.3
GL50803_96878	Kinase, NEK-like	9	7	75.85	73.31	73.79
GL50803_10527	hypothetical protein	16	29	72.06	59.73	62.17
GL50803_5768	hypothetical protein	18	17	82.115	62.85	70.03
GL50803_15988	hypothetical protein	27	15	70.44	72.52	71.48
GL50803_16076	Peroxiredoxin 1	23	15	82.15	73.12	76.58
GL50803_2342	hypothetical protein	29	14	81.33	83.54	81.71
GL50803_16900	Collagen alpha 1 chain precursor	13	5	82.71	91.48	82.815
GL50803_13133	hypothetical protein	14	23	62.59	67.07	64.23
GL50803_16887	ATP-dependent RNA helicase HAS1, putative	4	12	51.115	73	73
GL50803_16891	Protein C21orf2	31	37	76.84	70.7	71.125
GL50803_14566	Dipeptidyl-peptidase I precursor	72	36	48.62	53.615	50.29
GL50803_6563	Uracil phosphoribosyltransferase	85	77	69.33	59.89	62.855
GL50803_15987	hypothetical protein	25	19	71.9	60.79	64.765
GL50803_32658	Plasma membrane calcium-transporting ATPase 2	73	26	66.6	67.605	66.71
GL50803_137745	SMC3-like protein	9	4	57.38	44.46	54.38
GL50803_17579	Inositol-3-phosphate synthase	23	10	51.92	78.41	60
GL50803_14821	HesB domain-containing protein	24	21	54.525	63.42	58.17
GL50803_3367	Histone H3	86	73	71.06	62.35	65.39
GL50803_10885	4-alpha-glucanotransferase, amylo-alpha-1,6-glucosidase	113	38	70.04	61.05	68.14
GL50803_17612	hypothetical protein	6	6	83.515	63.4	67.99
GL50803_27953	hypothetical protein	24	13	77.115	74	76.48
GL50803_6284	Protein 21.1	10	2	91.93	76.04	91.93
GL50803_4349	Endothelin-converting enzyme 2	64	53	59.44	71.91	62.37
GL50803_101918	hypothetical protein	29	21	66.96	75.57	69.435
GL50803_93671	Casein kinase II beta chain	18	15	60.91	72.62	66.33
GL50803_10315	hypothetical protein	22	9	56.41	61.03	56.86
GL50803_3349	hypothetical protein	30	36	66.425	67.595	66.645
GL50803_11604	hypothetical protein	26	22	74.515	66.395	69.425
GL50803_87058	Vacuolar ATP synthase subunit C	55	45	67.57	64.26	65.885
GL50803_17546	hypothetical protein	13	7	81.92	63.97	81.09
GL50803_115796	VSP	64	3	61.86	65.07	61.87
GL50803_41512	Flagella associated protein	42	52	62.3	65.88	65.235
GL50803_22454	ARF GAP	37	32	66.37	67.805	67.13
GL50803_17265	Dynein heavy chain	153	63	78.17	85.11	79.25
GL50803_2933	Programmed cell death protein-like protein	61	59	69.39	68.35	68.805
GL50803_17571	Trichohyalin	15	16	72.24	61.9	70.11
GL50803_9060	hypothetical protein	18	8	63.97	69.89	64.935
GL50803_104250	hypothetical protein	212	252	82.06	75.565	78.525
GL50803_4331	26S proteasome non-ATPase regulatory subunit 6	32	15	67.38	71.78	67.92
GL50803_16926	hypothetical protein	16	15	84.695	73.73	74.69
GL50803_113133	hypothetical protein	101	61	60.68	67.27	63.945
GL50803_5333	Calmodulin	165	233	71.7	67.62	68.535
GL50803_13924	hypothetical protein	17	5	54.54	84.78	56.65
GL50803_16667	Acyl-CoA synthetase	123	69	67.12	69.22	68.59
GL50803_22850	Kinase, CMGC MAPK	48	68	71.92	67.79	69.795
GL50803_32893	hypothetical protein	10	3	72.645	81.76	73.83
GL50803_103878	hypothetical protein	13	8	65.52	77.95	75.46
GL50803_15244	hypothetical protein	15	7	65.31	65.08	65.195
GL50803_116713	hypothetical protein	26	23	66.075	74.72	67.87
GL50803_17608	Protein 21.1	14	7	70.045	89.91	74.35
GL50803_17260	hypothetical protein	8	6	71.945	94.645	79.85
GL50803_29307	UTP-glucose-1-phosphate uridylyltransferase	35	41	72.34	70.42	71.75
GL50803_8850	Protein 21.1	15	5	74.43	80.12	77.275
GL50803_14934	Kinase, NEK	9	3	57.46	55.22	57.055
GL50803_3157	hypothetical protein	7	3	52.22	54.71	53.465
GL50803_6306	hypothetical protein	9	4	60.91	50.085	53.41
GL50803_16876	hypothetical protein	31	17	71.76	69.32	70.88
GL50803_17025	Nuclear ATP/GTP-binding protein	31	22	52	61.92	53.1
GL50803_17082	Rab geranylgeranyltransferase	30	16	77.78	74.98	75.32
GL50803_16945	Kinesin-13	12	15	56.005	79.81	70.64
GL50803_3786	hypothetical protein	32	19	54.515	61.23	56.61
GL50803_16194	hypothetical protein	16	7	62.78	78.32	64.68
GL50803_11720	hypothetical protein	71	38	69.88	72.89	71.48
GL50803_11055	hypothetical protein	5	6	64.16	69.24	65.62
GL50803_16596	hypothetical protein	27	11	72.28	90.96	72.87
GL50803_17118	U2 small nuclear ribonucleoprotein A, putative	11	1	68.77	59.96	65.445
GL50803_41619	hypothetical protein	17	12	78.04	61.89	73.1
GL50803_7715	High cysteine membrane protein Group 1	84	8	58	43.59	56.565
GL50803_112207	VSP	55	18	64.7	62.65	62.65
GL50803_101955	hypothetical protein	17	10	69.87	72.625	71.79
GL50803_5553	Kinase, NEK	8	8	73.43	85.71	79.39
GL50803_121045	Histone H2B	268	224	63.88	70.8	65.83
GL50803_5164	Sugar-proton symporter	19	11	94.2	83.74	91.66
GL50803_16230	Hypothetical protein	18	4	69.47	51.08	65.975
GL50803_13360	Protein 21.1	10	13	71.7	74.04	74.04
GL50803_12108	Threonine dehydratase lateral transfer candidate	96	58	64.025	59.085	62.275
GL50803_17254	Phosphomannomutase-2	175	104	67.03	67.405	67.36
GL50803_17299	Kinase, NEK-like	13	11	86.57	96.36	92.555
GL50803_16924	20S proteasome alpha subunit 1	47	52	61.31	61.17	61.31
GL50803_115479	hypothetical protein	33	25	55.93	59.31	57.62
GL50803_11684	Leucine-rich repeat protein	40	25	58.395	52.85	55.5
GL50803_111936	VSP	145	NA	61.03	NA	61.03
GL50803_8235	Protein 21.1	49	44	60.57	59.365	60.46
GL50803_17288	Protein 21.1	9	5	58.33	85.54	68.385
GL50803_14661	Kinase, CAMK CAMKL	17	11	59.43	57.59	58.51
GL50803_4852	hypothetical protein	72	45	63.12	60.5	62.71
GL50803_16526	WD-repeat protein	13	17	63.6	76.41	69.76
GL50803_28626	VSP	12	5	69.855	89.3	70.53
GL50803_33674	hypothetical protein	7	3	92.12	76	90.995
GL50803_40496	Dynein heavy chain	67	18	72.84	60.575	71.89
GL50803_112801	VSP	85	5	63.07	55.39	62.565
GL50803_9611	hypothetical protein	24	17	71.025	65.04	67.13
GL50803_91774	hypothetical protein	30	17	74.02	72.58	73.67
GL50803_10254	Dynein intermediate chain	26	8	60.975	69.64	66.035
GL50803_30233	hypothetical protein	14	6	63.305	55.38	57.885
GL50803_3414	5-AMP-activated protein kinase, gamma-1 subunit	5	7	79.48	60.71	74.885
GL50803_5002	hypothetical protein	6	4	59.125	85.84	65.4
GL50803_6226	Glycogen phosphorylase	220	86	67.27	68.375	67.495
GL50803_17574	Coiled-coil protein	22	10	64.275	53.285	60.65
GL50803_27918	hypothetical protein	91	115	61.19	57.52	59.3
GL50803_8892	hypothetical protein	11	6	98	71.595	93.07
GL50803_9173	Serine/Threonine-protein kinase pkwA, putative	39	11	55.16	59.14	55.93
GL50803_11712	hypothetical protein	59	33	76.74	75.76	76.595
GL50803_113531	High cysteine membrane protein EGF-like	90	23	77.545	85.2	78.93
GL50803_14827	Ribosomal protein S11	309	353	65.54	64.47	65.085
GL50803_10530	Vacuolar ATP synthase 16 kDa proteolipid subunit	32	45	77.9	73.54	74.53
GL50803_26435	hypothetical protein	16	8	72.155	67.635	70.075
GL50803_137748	hypothetical protein	26	8	84.685	76.395	83.56
GL50803_7578	Dynein light chain	18	43	55.17	67.87	67.54
GL50803_134442	hypothetical protein	69	50	61.09	57.02	60.75
GL50803_14742	Kinase, NEK	67	49	77.36	77.16	77.36
GL50803_3994	Ubiquitin fusion degradation protein 1	11	24	71.61	77.175	75.62
GL50803_103202	hypothetical protein	15	11	67.97	94.88	76.575
GL50803_14702	RRNA biogenesis protein RRP5	22	10	72.345	59.69	69.84
GL50803_21138	hypothetical protein	8	4	93.94	91.76	93.94
GL50803_112208	VSP with INR	332	21	64.02	63.67	64
GL50803_14095	Replication factor C, subunit 4	49	27	61.76	50.92	58.14
GL50803_8745	hypothetical protein	18	13	81.595	74.3	80.08
GL50803_16376	ATP-dependent RNA helicase p47, putative	78	52	68.325	59.135	65.26
GL50803_8968	hypothetical protein	71	58	69.69	70.355	70.31
GL50803_17617	hypothetical protein	35	14	70.96	53.12	66.64
GL50803_14660	hypothetical protein	69	61	62.54	62.2	62.455
GL50803_101074	VSP with INR	95	21	72	72.5	72.43
GL50803_9062	Long chain fatty acid CoA ligase 5	27	14	71.07	63.5	66
GL50803_116561	unspecified product	9	8	61.15	71.63	67.63
GL50803_14317	hypothetical protein	14	17	86.45	72.19	74.74
GL50803_15099	20S proteasome alpha subunit 4	43	49	66.31	54.48	60.295
GL50803_4985	hypothetical protein	12	14	75.095	67.42	72.215
GL50803_38462	hypothetical protein	25	11	53.79	60.89	55.355
GL50803_113673	hypothetical protein	27	18	72.67	75.2	73.7
GL50803_17164	Sec24-like	19	9	77.17	70.88	74.96
GL50803_113892	Long chain fatty acid CoA ligase, putative	35	39	54.84	68.41	61.37
GL50803_28174	unspecified product	8	4	77.88	110.22	89.95
GL50803_9038	Nicotinate phosphoribosyltransferase	40	12	68.88	76.255	69.645
GL50803_4266	hypothetical protein	31	19	58.41	69.62	63.765
GL50803_221689	ABC transporter, putative	4	6	50.81	76.095	61.865
GL50803_5258	hypothetical protein	60	81	67.585	61.48	64.62
GL50803_8856	Kinase, NEK	26	16	77.925	79.02	77.925
GL50803_10708	hypothetical protein	35	10	56.76	58.18	57.13
GL50803_17190	Eukaryotic peptide chain release factor subunit 1	46	35	66.81	54	56.78
GL50803_15567	Rab2a	92	83	64.875	63.71	64.61
GL50803_88071	Protein 21.1	21	5	69.3	101.46	70.395
GL50803_9808	Chaperone protein DnaJ	81	97	60.59	68.78	63.3
GL50803_15310	hypothetical protein	32	18	65.44	56.895	64.895
GL50803_40995	IFT complex B	12	4	55.93	50.705	55.835
GL50803_4204	MutT/nudix family protein	93	63	74.2	72.79	73.875
GL50803_21943	hypothetical protein	33	48	64	68.86	67.28
GL50803_16235	Kinase, CAMK CAMKL	116	137	63.865	61.04	61.82
GL50803_86468	hypothetical protein	64	38	76.25	82.965	79.485
GL50803_114891	High cysteine membrane protein Group 3	37	8	67.9	63.79	67.9
GL50803_9307	Protein 21.1	16	10	76.445	91.47	83.725
GL50803_16720	hypothetical protein	31	14	82.22	75.73	78.56
GL50803_11164	Protein 21.1	42	31	76.235	68.48	73.64
GL50803_2980	20S proteasome alpha subunit 5	36	51	71.22	77	72.63
GL50803_21505	Protein 21.1	60	24	63.755	68.19	63.975
GL50803_11186	RNA binding protein, putative	47	54	66.19	65.01	66.19
GL50803_17448	DNA-directed RNA polymerase RPB2	29	17	74.12	77.28	74.415
GL50803_6464	hypothetical protein	76	37	63.445	60.84	62.89
GL50803_16532	Protein 21.1	87	50	59.14	56.91	57.92
GL50803_17249	Coiled-coil protein	158	65	62.02	55.47	59.07
GL50803_14497	20S proteasome alpha subunit 3	36	30	62.205	65.3	64.665
GL50803_15123	VSP	13	7	52.86	56.66	54.76
GL50803_16547	IFT complex A	15	5	67.27	38.73	64.295
GL50803_15049	Kinase, NEK	11	7	44.87	44.37	44.62
GL50803_8860	Kinase, NEK	7	3	69.31	83	79.925
GL50803_10889	hypothetical protein	19	8	77.67	69.46	76.82
GL50803_6148	Alanyl dipeptidyl peptidase	35	29	73.2	74.56	73.925
GL50803_1649	hypothetical protein	35	48	65.25	61.765	61.82
GL50803_14850	hypothetical protein	13	14	59.52	52.215	54.58
GL50803_5800	hypothetical protein	37	47	80.88	75.32	77.5
GL50803_29147	hypothetical protein	26	50	61.085	60.455	60.455
GL50803_4197	Phosphatidylinositol transfer protein alpha isoform	68	66	68.955	62.22	64.995
GL50803_8843	Ubiquitin	12	11	90.26	70.17	82.21
GL50803_4165	NOD3 protein, putative	9	4	64.48	94.195	75
GL50803_14310	hypothetical protein	25	17	60.74	85.26	73.92
GL50803_4539	unspecified product	5	9	90.84	80.52	86.475
GL50803_7234	hypothetical protein	35	8	93.5	76.24	91.12
GL50803_9505	hypothetical protein	7	14	67.88	69.615	67.88
GL50803_9036	hypothetical protein	23	18	62.75	49.57	55
GL50803_10791	hypothetical protein	23	20	67.24	80.6	77.04
GL50803_13981	Kinase, NEK	24	16	80.595	58.785	75.11
GL50803_89315	VSP	52	4	78.295	70.63	78.275
GL50803_93463	hypothetical protein	22	24	66.84	76.965	71.815
GL50803_7825	hypothetical protein	36	43	70.39	69.17	70.07
GL50803_137689	hypothetical protein	20	6	56.125	93.845	60.62
GL50803_15918	hypothetical protein	112	80	67.18	72.9	68.435
GL50803_24068	UBC3	22	10	55.69	70.84	57.915
GL50803_11436	Molybdopterin biosynthesis MoeB protein	45	31	76.33	65.21	73.13
GL50803_14891	hypothetical protein	10	7	85.445	96.36	91.6
GL50803_86593	hypothetical protein	17	7	62.96	45.89	55.745
GL50803_15574	Alanyl dipeptidyl peptidase	61	23	74.36	75.19	74.765
GL50803_9237	WRKY transcription factor 4, putative	14	7	57.045	101.23	65.71
GL50803_23833	Vacuolar protein sorting 35	74	67	65.015	65.28	65.07
GL50803_32676	hypothetical protein	23	15	82.95	90.04	88.94
GL50803_6709	hypothetical protein	16	19	82.465	85.88	85.85
GL50803_7706	hypothetical protein	25	7	58.07	65.5	58.285
GL50803_16659	hypothetical protein	38	19	72.365	63.03	69.45
GL50803_3256	EH domain binding protein epsin 2	83	44	67.37	68.505	67.37
GL50803_14460	Ubiquitin carboxyl-terminal hydrolase 4	46	21	58.64	57.46	57.46
GL50803_113415	hypothetical protein	10	3	90.37	95.29	93.96
GL50803_17389	SUA5 protein	12	8	59.585	63.345	62.365
GL50803_25235	hypothetical protein	9	3	74.92	39.16	67.965
GL50803_9493	Coiled-coil protein	11	4	73.76	39.35	68.96
GL50803_103818	hypothetical protein	13	3	67.64	59.52	64.105
GL50803_17432	Heat shock protein 70	22	13	74.085	64.61	73.59
GL50803_16760	Phenylalanyl-tRNA synthetase beta chain	38	17	66.26	86.33	66.84
GL50803_8913	Hydroxyacylglutathione hydrolase	14	14	89.98	77.955	83.38
GL50803_29487	Protein disulfide isomerase PDI1	198	157	61.06	65.33	62.2
GL50803_119707	VSP with INR	21	1	62.38	44.56	59.785
GL50803_2851	Histone acetyltransferase MYST2	14	8	74.295	63.425	73.425
GL50803_14759	6-phosphogluconate dehydrogenase, decarboxylating	49	53	77.5	64.3	72.58
GL50803_31366	hypothetical protein	157	50	72.72	73.715	73.48
GL50803_14133	Protein 21.1	20	12	73.185	70.92	70.92
GL50803_93800	Ser/Thr protein kinase	15	9	65.44	61.6	64.12
GL50803_115052	Multidrug resistance-associated protein 1	73	25	65.74	59.23	65.22
GL50803_96460	Alanyl-tRNA synthetase	37	32	66.92	57.73	64.12
GL50803_17036	hypothetical protein	9	7	66.44	84.75	82.26
GL50803_13720	hypothetical protein	16	7	71.95	56.77	66.42
GL50803_101501	Seryl-tRNA synthetase	43	55	73	61.39	69.385
GL50803_3546	Kinase, NEK	23	7	74.09	79.96	75.25
GL50803_9099	hypothetical protein	18	16	75.215	69.05	70.405
GL50803_8329	hypothetical protein	41	28	57.27	68.49	61.92
GL50803_15497	hypothetical protein	32	16	79.185	46.62	73.22
GL50803_16731	hypothetical protein	29	18	59.5	65.47	62.65
GL50803_3417	Preimplantation protein 3	22	24	58.72	54.88	56.99
GL50803_15124	Dynein light chain	44	57	59.915	62.28	61.54
GL50803_115239	Translation initiation factor IF-2, putative	26	7	82.105	63.11	75.5
GL50803_6120	hypothetical protein	32	13	52.27	94.81	61.86
GL50803_14971	hypothetical protein	28	21	62.57	61.11	62.4
GL50803_17195	hypothetical protein	95	76	62.69	62.095	62.67
GL50803_11311	Kinase, NEK	31	43	73.96	69.78	70.955
GL50803_24947	hypothetical protein	42	55	55.55	55.63	55.63
GL50803_22857	unspecified product	15	5	72.21	59.59	68.72
GL50803_102101	Kinesin-3	118	44	66.65	65.935	66.65
GL50803_91761	Sec1, putative	19	9	76.58	58.67	74.56
GL50803_92760	hypothetical protein	31	29	77.67	53.92	71
GL50803_135831	VSP	31	8	55.03	72.72	59.89
GL50803_14704	hypothetical protein	46	15	72.205	83	74.16
GL50803_9259	hypothetical protein	14	4	71.865	102.4	74.89
GL50803_41687	Protein 21.1	20	15	64.645	78	73.65
GL50803_137614	VSP AS12	35	10	71.48	55.965	66.43
GL50803_7195	Glutamate synthase	92	51	63.79	68.87	64.4
GL50803_5346	Kinase, NEK	66	33	69.215	68.46	68.93
GL50803_103981	hypothetical protein	13	10	43.5	97.035	63.8
GL50803_1695	Rab11	69	83	64.57	58.54	61.99
GL50803_42780	hypothetical protein	27	18	74.56	64.26	70
GL50803_17465	SMC4-like protein	24	8	60.075	76.19	63.36
GL50803_102178	VSP	10	2	59.57	40.92	55.445
GL50803_13864	Heat shock protein HSP 90-alpha	163	501	61.42	63.77	63.315
GL50803_17192	Protein transport protein Sec7	30	6	74.81	70.625	74.81
GL50803_8559	Vacuolar ATP synthase 16 kDa proteolipid subunit	193	237	66.12	59.23	62.12
GL50803_96670	Potassium-transporting ATPase alpha chain 1	84	48	76.99	75.295	75.675
GL50803_7778	hypothetical protein	33	35	65.88	61.21	62.78
GL50803_42357	hypothetical protein	17	11	62.15	80.81	66.975
GL50803_9296	hypothetical protein	28	28	90.12	90.96	90.545
GL50803_10019	Phospholipid-transporting ATPase IA, putative	31	7	73.04	83.07	74.115
GL50803_32686	hypothetical protein	26	18	83.165	95.895	86.655
GL50803_28614	hypothetical protein	18	18	62.045	66.09	63.535
GL50803_113971	Transducin	10	9	62.595	65.83	63.07
GL50803_102180	High cysteine protein	11	3	64.62	64.76	64.69
GL50803_15247	Grp94/Hsp90	78	34	70.445	82.01	72.075
GL50803_2007	hypothetical protein	25	13	57.81	43.93	55.205
GL50803_8250	hypothetical protein	64	71	59.6	56.27	58.5
GL50803_7323	hypothetical protein	69	35	62	72.73	65.39
GL50803_12225	hypothetical protein	15	8	88.43	95.45	88.43
GL50803_9148	H-SHIPPO 1	61	69	70.5	66.34	69.215
GL50803_35389	hypothetical protein	13	3	96.97	94.54	95.755
GL50803_17199	Sun/nucleolar protein family protein	15	12	76.65	75.765	76.65
GL50803_17109	Vacuolar protein sorting 11	62	24	70.775	67.12	70.18
GL50803_103785	hypothetical protein	43	21	66.93	61.26	63.7
GL50803_88735	Protein 21.1	21	14	85.83	63.66	80.33
GL50803_15530	hypothetical protein	23	21	84.74	70.92	77.095
GL50803_15127	Deoxyribose-phosphate aldolase lateral transfer candidate	42	54	59.635	55.9	56.405
GL50803_4156	HIT family protein	26	49	67.36	77.92	74.36
GL50803_22165	Kinase, STE STE20	49	92	70.38	71.6	71.59
GL50803_2825	Ribosomal protein L7Ae	56	48	71.07	74.415	71.9
GL50803_17516	Cathepsin B precursor	118	122	65.285	62.52	64.83
GL50803_9899	hypothetical protein	30	22	62.905	58.775	62.22
GL50803_9834	Endonuclease/Exonuclease/phosphatase	10	7	74.715	62.67	63.38
GL50803_14790	hypothetical protein	30	20	80.16	75.585	77.86
GL50803_114852	High cysteine membrane protein VSP-like	24	6	80	79.15	80
GL50803_87519	hypothetical protein	83	27	76.62	85.76	80.455
GL50803_15429	Glutathione synthetase, putative	8	4	94.88	93.665	94.88
GL50803_2834	ARF GAP	86	92	64.44	66.95	65.88
GL50803_8958	hypothetical protein	1	10	94.84	89.19	94.84
GL50803_5859	hypothetical protein	14	9	34.055	75.31	54.87
GL50803_6413	hypothetical protein	12	16	68.215	70.165	68.215
GL50803_10969	Nucleotide-binding protein 1	99	72	64.08	67.59	65.54
GL50803_5795	Leucine-rich repeat protein 1 virus receptor protein	45	27	67.09	60.54	66.48
GL50803_17460	G1 to S phase transition protein 1, putative	51	33	63.72	73.62	67.44
GL50803_16433	Amino acid permease, putative	29	19	72.91	68.57	72.835
GL50803_8789	hypothetical protein	30	16	75.78	75.54	75.78
GL50803_6664	Zinc transporter domain protein	18	17	59.49	57.58	57.58
GL50803_6436	Guanine phosphoribosyltransferase	33	40	69.22	74.905	74.3
GL50803_4687	hypothetical protein	8	7	68.63	74.08	74.08
GL50803_8805	Kinase, SCY1	127	63	64.27	53.17	60.895
GL50803_16371	Nucleolar GTP-binding protein 1, putative	29	20	72.04	68.93	69.3
GL50803_13467	hypothetical protein	33	21	59.16	74.86	65.02
GL50803_14895	Spindle pole protein, putative	36	22	68.04	60.83	65.96
GL50803_95192	Protein 21.1	49	24	69.35	56.515	62.04
GL50803_16240	hypothetical protein	11	13	57.87	88.79	80.46
GL50803_12162	Phenylalanyl-tRNA synthetase alpha chain	32	26	58.2	55.98	56.12
GL50803_137754	hypothetical protein	25	18	71.48	64.84	68.25
GL50803_37449	hypothetical protein	25	3	77	54.62	76.795
GL50803_102056	hypothetical protein	8	2	80.095	53.04	65.69
GL50803_2198	Serine/threonine protein phosphatase 5	50	28	68.275	64.765	65.705
GL50803_14318	hypothetical protein	31	27	73.63	85.42	77.84
GL50803_14327	hypothetical protein	15	5	87.36	73.07	87.32
GL50803_101326	hypothetical protein	29	26	68.25	60.66	66.63
GL50803_103285	Protein BAP28	17	17	56.03	91.58	72.35
GL50803_10299	hypothetical protein	41	38	73.62	72.895	73.62
GL50803_9289	Kinase, NEK	17	18	74.71	62.99	71.3
GL50803_3538	hypothetical protein	15	40	65.73	60.16	63.32
GL50803_135002	Histone H4	188	150	70.355	61.3	66.935
GL50803_137761	VSP	68	2	64.29	62.16	64.29
GL50803_11992	TCP-1 chaperonin subunit epsilon	67	56	67.07	59.55	65.19
GL50803_3957	Kinase, NEK	14	10	63.26	63.9	63.9
GL50803_35151	unspecified product	16	4	71.515	103.165	72.62
GL50803_17563	Kinase, CMGC MAPK	44	37	71.21	72.93	71.93
GL50803_15454	hypothetical protein	25	16	60.61	82.105	71.21
GL50803_8382	Short-chain dehydrogenase, putative	13	9	76.53	76.07	76.3
GL50803_10324	Ribulose-phosphate 3-epimerase	25	12	67.82	82.66	70.48
GL50803_10696	hypothetical protein	16	21	74.24	76.92	76.24
GL50803_112846	Kinesin-3	77	41	58.4	56.93	57.575
GL50803_3095	hypothetical protein	32	19	82.705	66.42	75.68
GL50803_480	Translation initiation inhibitor	20	7	64.475	88.19	68.04
GL50803_14345	Coiled-coil protein	11	13	70.23	72.47	71.35
GL50803_14573	Tenascin-X	79	42	74.77	71.455	74
GL50803_7081	hypothetical protein	13	14	68.14	81.705	73.88
GL50803_4083	Ubiquitin-conjugating enzyme E1	8	3	72.26	48.21	69.63
GL50803_15871	Serine peptidase, putative	93	53	65.31	67.26	66.91
GL50803_7577	hypothetical protein	11	7	72.47	90.19	79.96
GL50803_7608	hypothetical protein	10	4	69.395	79.77	69.395
GL50803_6344	Protein 21.1	28	37	61.555	53.69	58.87
GL50803_104866	GTL3 aka MD0260	43	57	68.11	68.52	68.315
GL50803_13288	hypothetical protein	23	10	59.59	69.68	63.54
GL50803_7414	Protein 21.1	35	31	52.69	64.48	57.65
GL50803_114626	High cysteine membrane protein EGF-like	72	32	72.645	80.64	76.57
GL50803_7270	hypothetical protein	16	12	86.72	73.15	83.305
GL50803_87056	hypothetical protein	10	2	74.425	91.565	74.425
GL50803_11495	Rab GDI	39	20	66.92	78.61	67.56
GL50803_7031	Spindle pole protein, putative	72	38	68.54	60.555	67.275
GL50803_87039	hypothetical protein	15	6	84.47	110.975	84.82
GL50803_40630	VSP	64	14	68.23	60.94	67.45
GL50803_86681	Glutaminyl-tRNA synthetase	38	43	74.93	72	72.59
GL50803_5812	VSP	25	6	85.27	79.335	85.27
GL50803_11151	hypothetical protein	13	11	69.71	46.92	68.445
GL50803_14277	N-acetyltransferase-like protein	19	15	54.04	80.64	62.155
GL50803_137724	Hypothetical protein	24	14	77.405	83.87	79.33
GL50803_20902	unspecified product	17	6	75.93	86.21	80.07
GL50803_113954	VSP	21	10	67.15	81.115	80.54
GL50803_13390	VSP	97	3	65.48	57.47	65.05
GL50803_8460	hypothetical protein	13	11	66.5	77.19	72.14
GL50803_89285	hypothetical protein	11	7	95.52	65.19	84.735
GL50803_102108	Clathrin heavy chain	131	50	70	61.32	65.19
GL50803_10950	Protein 21.1	13	3	89.38	117.43	95.49
GL50803_3934	hypothetical protein	26	29	61.35	64.94	63.32
GL50803_9116	Kinase, CMGC GSK	23	8	58.62	88.525	66.21
GL50803_14346	hypothetical protein	17	9	80.56	44.5	60
GL50803_16829	Calcineurin B subunit	17	20	59.46	68.89	60.15
GL50803_113793	hypothetical protein	19	10	80	80.85	80
GL50803_16068	hypothetical protein	24	14	63.705	58.03	62.26
GL50803_19259	hypothetical protein	46	23	87.16	65.3	85.76
GL50803_9662	Ferredoxin Fd1, Fd2	87	90	57.39	56.395	56.96
GL50803_92246	Cation-transporting ATPase 2, putative	46	24	72.04	66.885	69.96
GL50803_41626	VSP	25	1	71.37	101.9	74.37
GL50803_7287	Small glutamine-rich tetratricopeptide repeat-containing protein	93	88	65.49	66.7	65.57
GL50803_17565	TBP-interacting protein TIP49	26	18	62.87	68.98	67.63
GL50803_2876	UBC2, putative	20	27	81.72	63.46	73.17
GL50803_13668	hypothetical protein	16	4	69.75	87.105	70.935
GL50803_137740	VSP	62	49	71.03	64.5	67.56
GL50803_8722	Myb 1-like protein	55	20	83.89	85.365	84.29
GL50803_16888	hypothetical protein	18	2	69.64	77.085	69.64
GL50803_101832	High cysteine protein	72	34	74.67	74.21	74.21
GL50803_95786	hypothetical protein	15	8	65.08	63.955	65.08
GL50803_8855	P115, putative	43	33	66.66	63.56	65.755
GL50803_3209	Proteasome subunit beta type 2	26	34	67.15	62.555	64.565
GL50803_27141	hypothetical protein	10	2	55.76	29.785	52.125
GL50803_14438	hypothetical protein	17	9	75.31	75.85	75.58
GL50803_7007	hypothetical protein	59	54	71.78	65.24	70.48
GL50803_16227	Protein 21.1	18	6	45.54	40.235	42.28
GL50803_112870	hypothetical protein	28	20	57.135	65.475	62.44
GL50803_114497	hypothetical protein	42	14	67.775	65.845	67.265
GL50803_16365	hypothetical protein	26	5	67.75	51.72	66.74
GL50803_10034	hypothetical protein	8	5	66.365	51.5	58.16
GL50803_15063	Long chain fatty acid CoA ligase 5	31	16	78.5	68.815	71.07
GL50803_27308	Dynein light chain	27	36	75.86	59.21	68.52
GL50803_114546	hypothetical protein	11	5	68.15	62.35	66.005
GL50803_3951	hypothetical protein	36	19	70.47	51.12	66.1
GL50803_27310	Stress-induced-phosphoprotein 1	18	38	61.25	62.545	62.545
GL50803_2012	hypothetical protein	45	53	69.28	70.88	69.335
GL50803_16607	hypothetical protein	14	8	64.03	76.425	67.24
GL50803_12770	hypothetical protein	32	24	67.7	74.34	70.655
GL50803_15011	hypothetical protein	53	45	70.35	56	61.625
GL50803_15148	Chaperone protein dnaJ	29	30	71.08	69.83	70.81
GL50803_16520	Sec24-like	13	3	42.48	58.59	51.85
GL50803_3822	Dipeptidyl-peptidase III	28	29	75.88	65.92	68.81
GL50803_16843	Protein 21.1	18	11	74.005	61.92	68.27
GL50803_7203	Guanylate kinase	7	11	43.28	55.83	54.325
GL50803_111933	VSP	166	1	62.335	51.39	61.83
GL50803_24842	Protein 21.1	120	49	72.17	77.86	73.6
GL50803_16795	Topoisomerase II	39	39	57.78	62.54	61.535
GL50803_24584	hypothetical protein	12	2	88.335	51.675	80.27
GL50803_22547	High cysteine membrane protein Group 2	21	8	81.38	83.565	81.38
GL50803_1657	Translation initiation factor	41	42	69.32	59.065	67.72
GL50803_22806	hypothetical protein	16	6	56.71	76.625	58.745
GL50803_32210	hypothetical protein	10	2	71.52	45.815	58.945
GL50803_13825	Kinesin-1	31	8	75.87	86.04	76.8
GL50803_137729	VSP	83	5	68.93	69.61	69
GL50803_6492	hypothetical protein	15	2	74.09	76.88	74.09
GL50803_9503	hypothetical protein	41	22	69.56	73.11	70.91
GL50803_137617	VSP	46	56	89.61	71.18	75.585
GL50803_14509	hypothetical protein	7	5	58.14	89.67	68.355
GL50803_31295	DinF protein	9	3	86.96	130.93	94.78
GL50803_134802	unspecified product	18	8	81.22	87.53	81.835
GL50803_4602	Reductase, putative	11	8	53.37	46.635	49.57
GL50803_13766	Protein 21.1	29	19	76.32	56.08	67.71
GL50803_10459	CGI-35 protein, putative	20	22	77.145	67.155	70.625
GL50803_15600	hypothetical protein	14	23	72.835	60.56	71.46
GL50803_15067	hypothetical protein	7	6	63.37	66.245	63.37
GL50803_r0020	18S ribosomal RNA	62	31	12.55	20.26	16.11
GL50803_13708	Ubiquitin	9	8	87	57.66	76.48
GL50803_32697	hypothetical protein	10	13	65.91	79.08	78
GL50803_102662	VSP	98	8	69.27	55.03	69.13
GL50803_4016	hypothetical protein	24	7	63.245	82.61	67.17
GL50803_102813	Protein 21.1	94	101	56.345	54.21	54.94
GL50803_13727	VSP	40	9	67.84	72.92	69.4
GL50803_9541	TRAPPC5/Trs31	23	12	66.54	58.625	59.97
GL50803_9354	Kinase, NEK	7	6	99.15	65.39	81.62
GL50803_14745	Protein 21.1	9	10	73.29	54.44	70.9
GL50803_14458	Hypothetical protein	35	25	66.12	64.62	65.37
GL50803_93002	hypothetical protein	23	13	79.91	68.46	78.33
GL50803_14921	hypothetical protein	34	30	63.275	70.805	64.845
GL50803_6248	hypothetical protein	21	14	64.58	67.575	65.2
GL50803_15581	hypothetical protein	27	12	63.29	72.795	63.96
GL50803_102515	RNA-directed RNA polymerase, putative	14	8	90.31	85.53	89.01
GL50803_10608	hypothetical protein	54	33	72.095	65.41	68.31
GL50803_14547	L-asparaginase	53	26	72.48	70.97	72.3
GL50803_8038	Hypothetical protein	35	25	72.82	72.31	72.565
GL50803_13215	Kinase, NEK	16	7	56.425	58.68	58.56
GL50803_14939	hypothetical protein	10	7	69.55	72.08	70.45
GL50803_13661	Eukaryotic translation initiation factor 3 subunit 2	46	25	65.315	78.73	70.57
GL50803_10609	Kinase, STE STE20	26	21	55.88	64.31	58.86
GL50803_11287	Ribosomal protein L7Ae	60	39	62.995	60.03	60.71
GL50803_26800	hypothetical protein	30	16	64.6	70.05	67.165
GL50803_4018	hypothetical protein	21	21	70.42	49.81	61.905
GL50803_33279	VSP	138	1	72.265	43.85	72.14
GL50803_16504	hypothetical protein	56	39	63.74	64.69	63.78
GL50803_15265	hypothetical protein	32	7	74.07	56.35	73.03
GL50803_102022	hypothetical protein	9	3	61.71	66.87	62.855
GL50803_17568	Protein 21.1	33	39	67.34	74.34	69.805
GL50803_13756	Proteasome subunit beta type 3	45	33	67.38	66.2	66.79
GL50803_34906	hypothetical protein	19	13	92.79	75.46	84.215
GL50803_5277	hypothetical protein	9	10	44.16	72.77	56.04
GL50803_3861	Alcohol dehydrogenase 3 lateral transfer candidate	121	74	70.09	70.54	70.09
GL50803_23602	RTCB PROTEIN	19	9	85.46	70.92	83.34
GL50803_41349	VSP	8	5	65.4	86.9	69.37
GL50803_3341	hypothetical protein	9	8	95.96	65.47	76.48
GL50803_94117	hypothetical protein	31	13	63.26	85.03	71.5
GL50803_13948	hypothetical protein	39	11	82.11	69.61	81.47
GL50803_12061	hypothetical protein	16	1	55.635	88.12	58.87
GL50803_17622	Kinase, NEK	17	11	69.04	69.97	69.805
GL50803_137723	VSP	42	2	69.245	46.58	68.04
GL50803_15955	DNA-directed RNA polymerase II RPB6	24	29	77.84	77.64	77.64
GL50803_27602	hypothetical protein	9	4	78.24	51.425	60.62
GL50803_4690	hypothetical protein	17	6	65.27	71.965	65.27
GL50803_15483	hypothetical protein	48	41	73.89	62.8	66.08
GL50803_9803	La ribonucleoprotein, putative	18	29	77.6	56.53	57.04
GL50803_15304	Protein 21.1	10	11	61.355	37.85	52.23
GL50803_19389	unspecified product	23	50	66.23	69.165	68.27
GL50803_16902	hypothetical protein	17	9	73.32	77.11	75.16
GL50803_11206	unspecified product	9	4	88.17	79.37	88.17
GL50803_11139	hypothetical protein	9	10	71.19	63.46	66.6
GL50803_11099	Protein 21.1	10	1	82.33	39.32	72.62
GL50803_106320	Zinc finger domain protein	16	4	49.255	80.71	60.01
GL50803_17326	Na+ driven multidrug efflux pump	10	NA	88.42	NA	88.42
GL50803_17422	RNA polymerase I subunit A43	15	10	83.52	66.5	77.17
GL50803_5613	hypothetical protein	40	29	44.72	55.15	47.27
GL50803_8173	Glycerol kinase	39	9	87.39	75.55	87.035
GL50803_17056	Ribosomal protein L9	66	26	62.895	57.46	61.545
GL50803_16405	hypothetical protein	16	17	69.455	86.9	74.3
GL50803_7021	Protein 21.1	10	15	79.985	75.3	76.04
GL50803_8708	Eukaryotic translation initiation factor 1A	46	30	52.365	69.325	60.375
GL50803_8903	Copine I	22	40	80.84	82.355	80.84
GL50803_15340	Protein 21.1	14	2	65.08	69.88	67.35
GL50803_101589	High cysteine protein	24	8	66.125	99.18	68.385
GL50803_91220	Kinase, NEK	17	10	50.35	41.03	45.32
GL50803_101450	Protein 21.1	6	4	69.455	37.805	52.57
GL50803_14104	hypothetical protein	28	15	76.4	65.24	69.73
GL50803_30476	Long chain fatty acid CoA ligase 4	9	9	77.93	47	58.045
GL50803_17316	Inorganic polyphosphate/ATP-NAD kinase, putative	26	4	74.435	135.68	75.63
GL50803_16815	Seven transmembrane protein 1	11	16	53.36	69.77	64.08
GL50803_111886	hypothetical protein	15	2	76.54	78.08	76.54
GL50803_10870	Aspartyl-tRNA synthetase	96	77	64.045	63.75	63.88
GL50803_137713	hypothetical protein	11	5	68.92	67.21	68.72
GL50803_38776	unspecified product	39	21	74.85	81.92	76.62
GL50803_16384	hypothetical protein	41	19	63.62	63.73	63.675
GL50803_6751	hypothetical protein	19	13	72.36	69.5	69.69
GL50803_17593	hypothetical protein	13	6	80.89	111.03	81.78
GL50803_114698	hypothetical protein	10	7	68.505	55.83	67.55
GL50803_10297	U3 small nucleolar RNA interacting protein, putative	8	6	69.02	63.87	69.02
GL50803_90343	Kinase, Wnk	50	36	72.36	71.745	72.175
GL50803_16768	hypothetical protein	9	3	63.12	64.17	63.645
GL50803_15256	Undecaprenyl pyrophosphate synthase	15	3	91.72	59.64	83.395
GL50803_113871	hypothetical protein	14	9	88.805	98.5	89.25
GL50803_100580	hypothetical protein	10	2	73.075	67.78	71.135
GL50803_9181	hypothetical protein	17	2	40.26	23.72	34.91
GL50803_11976	hypothetical protein	6	11	54.01	71.42	68.38
GL50803_16220	Protein 21.1	17	7	53.7	52.33	53.015
GL50803_8152	Kinase, NEK	21	10	63.78	63.81	63.78
GL50803_14846	hypothetical protein	24	10	76.56	78.255	76.91
GL50803_7268	Protein 21.1	25	27	65.44	58.43	60.16
GL50803_8707	N-terminal acetyltransferase complex ARD1 subunit, putative	38	26	69.55	68.69	69.035
GL50803_16054	hypothetical protein	11	6	66.75	88.295	79.89
GL50803_15158	Variant-specific surface protein	11	5	62.15	82.58	79.785
GL50803_14933	hypothetical protein	9	7	71.73	53.37	63.29
GL50803_104031	Glycogen synthase, putative	24	13	75.355	71.79	75.3
GL50803_14174	Glutamate-rich WD-repeat protein	32	12	56.62	68.435	64.51
GL50803_33663	hypothetical protein	13	5	90.27	103.58	92.535
GL50803_41288	Mucin-like protein	18	8	76.035	64.27	71.2
GL50803_9573	hypothetical protein	33	18	74.26	69.315	69.46
GL50803_13316	hypothetical protein	17	19	59.72	84.15	71.54
GL50803_9825	TBP-interacting protein TIP49	60	35	69.06	68.75	68.75
GL50803_11373	hypothetical protein	11	2	84.04	220.54	84.04
GL50803_11131	hypothetical protein	19	14	67.67	66.635	67.67
GL50803_111950	Dynein heavy chain	69	19	68.61	66.84	67.725
GL50803_11488	hypothetical protein	16	17	65.27	70.97	69.96
GL50803_6592	hypothetical protein	34	18	83.085	73.725	79.58
GL50803_15120	hypothetical protein	22	18	68.085	73.865	73.365
GL50803_23447	hypothetical protein	29	11	80.04	85.74	81.07
GL50803_17110	hypothetical protein	11	8	67.08	76.375	72.53
GL50803_17482	TCP-1 chaperonin subunit alpha	36	43	62.96	67.44	63.04
GL50803_16552	hypothetical protein	21	10	67.14	88.67	78.04
GL50803_92221	hypothetical protein	9	2	75.34	72.1	75.34
GL50803_16549	Uridine kinase	37	29	73.48	78.87	76.045
GL50803_13897	MCT-1 protein-like protein	143	111	64.61	64.78	64.695
GL50803_12945	Hypothetical protein	27	7	61.13	61.71	61.42
GL50803_35332	hypothetical protein	8	5	78.495	72.46	72.46
GL50803_95898	ATP-dependent RNA helicase	32	19	75.33	63.21	67.74
GL50803_10570	FKBP-type peptidyl-prolyl cis-trans isomerase	28	75	66.95	58.38	59.81
GL50803_3154	hypothetical protein	16	20	60.04	62.975	61.05
GL50803_93550	hypothetical protein	30	9	76.64	105.96	77
GL50803_33629	hypothetical protein	37	24	60.92	71.115	64.15
GL50803_39373	unspecified product	13	13	70.9	74.65	72.775
GL50803_7593	hypothetical protein	51	31	82.31	71.14	75.535
GL50803_28549	hypothetical protein	49	33	72.42	72.33	72.375
GL50803_88059	hypothetical protein	29	41	80.35	77.03	78.29
GL50803_5927	hypothetical protein	41	22	55.84	46.335	51.09
GL50803_3287	Acetyl-CoA acetyltransferase	29	11	68.17	77.32	68.485
GL50803_10939	hypothetical protein	26	11	88.325	77.89	83.04
GL50803_8367	VATPase	36	44	66.01	67.065	67.045
GL50803_23699	hypothetical protein	20	4	96.65	83.455	94.255
GL50803_10370	ATP/GTP binding protein, putative	65	46	65.41	60.04	63.52
GL50803_7966	hypothetical protein	14	15	78.67	77.29	77.93
GL50803_4928	hypothetical protein	19	21	61.84	68.52	67.23
GL50803_11867	Coiled-coil protein	23	5	72.42	73.04	72.73
GL50803_6081	Protein 21.1	15	8	52.47	47.345	51.21
GL50803_137681	VSP	17	5	60.42	92.55	65.635
GL50803_18559	hypothetical protein	4	6	54.715	95.205	63.425
GL50803_24453	hypothetical protein	35	21	60.64	73.58	63.045
GL50803_42442	Transitional endoplasmic reticulum ATPase	6	6	51.78	58.415	51.78
GL50803_6679	hypothetical protein	55	53	77.23	84.21	78.21
GL50803_27852	hypothetical protein	10	6	57.1	47.24	55.505
GL50803_13201	hypothetical protein	6	5	80.52	98.75	84.19
GL50803_2562	Sec31	20	17	65.46	57.12	60.83
GL50803_14299	hypothetical protein	134	87	59.27	56.59	57.77
GL50803_137603	TMP52	70	21	70.205	71.41	71.19
GL50803_12116	hypothetical protein	8	5	77.445	92.08	78.33
GL50803_9196	Kinase, NEK	47	33	70.15	59.54	65.405
GL50803_10661	Ubiquitin-conjugating enzyme E1	30	19	75.28	79.26	75.6
GL50803_41369	Protein 21.1	10	7	69.27	59.85	66.79
GL50803_16226	hypothetical protein	11	2	65.77	108.695	70.48
GL50803_17143	Pyruvate kinase	123	87	70.73	71.11	70.92
GL50803_23424	hypothetical protein	8	11	51.58	62.27	61.67
GL50803_3903	Protein 21.1	11	11	45.34	67.96	52.15
GL50803_5522	hypothetical protein	11	3	84.15	52.13	76.575
GL50803_14048	EB1	13	32	68.52	57.23	62.71
GL50803_3169	Cathepsin L precursor	29	18	76.88	75.23	75.57
GL50803_15460	Dynein-like protein	26	16	67.89	78.385	71.455
GL50803_3643	70 kDa peptidylprolyl isomerase, putative	26	101	59.725	54.1	55.32
GL50803_16966	hypothetical protein	24	7	68.9	85	72.15
GL50803_14961	Vacuolar ATP synthase subunit H	22	8	70.17	96.505	74.105
GL50803_17584	hypothetical protein	24	11	62.29	73.97	69.96
GL50803_16934	Tetratricopeptide repeat protein	8	5	85.99	49.83	66.11
GL50803_115129	hypothetical protein	11	4	80.96	52.465	61.36
GL50803_6422	hypothetical protein	7	3	63.88	106.36	71.265
GL50803_16273	hypothetical protein	13	6	58.39	71.955	66.53
GL50803_9751	Chaperone protein dnaJ	31	19	62.92	68.96	67.335
GL50803_104685	Caltractin	63	105	59.37	60.72	60.545
GL50803_37811	Hypothetical protein	8	5	62.185	90.19	68.5
GL50803_15906	Tubulin specific chaperone D	14	11	76.8	57.67	69.28
GL50803_20802	Zinc finger domain protein	20	7	53.265	52.41	52.41
GL50803_34442	VSP, putative	76	NA	66.255	NA	66.255
GL50803_8619	Zinc finger domain protein	12	3	73.85	94	74.5
GL50803_9132	hypothetical protein	7	4	61.49	74.895	74.72
GL50803_40390	Protein 21.1	26	8	61.19	61.71	61.71
GL50803_117204	VSP	27	3	59.97	40.55	59.485
GL50803_17229	hypothetical protein	7	5	78.41	97.24	87.4
GL50803_17400	hypothetical protein	38	61	64.655	70.24	67.48
GL50803_16721	High cysteine membrane protein Group 2	34	22	85.38	93.56	89.825
GL50803_22814	hypothetical protein	16	24	81.705	95.275	91.895
GL50803_112114	Splicing factor-like protein, putative	9	6	98.72	80.4	89.48
GL50803_113970	hypothetical protein	10	4	58.515	89.825	61.135
GL50803_7953	Arsenical pump-driving ATPase	41	31	67.82	58.68	62.185
GL50803_8794	Nucleolar GAR1-like protein, putative	21	15	69.87	54.15	68
GL50803_16157	hypothetical protein	18	5	72.86	55.61	64.32
GL50803_21318	hypothetical protein	15	8	64.12	60.14	60.92
GL50803_87628	VSP	33	2	62	84.73	62.37
GL50803_14874	hypothetical protein	13	16	64.79	59.595	62.15
GL50803_4502	ER lumen protein retaining receptor	8	9	68.695	53.62	68.46
GL50803_5786	Ribosome biogenesis protein NEP1, putative	9	11	46.64	58.93	53.38
GL50803_34641	hypothetical protein	15	11	80.78	67.08	76.175
GL50803_96616	Kinase, CMGC CDKL	10	6	69.7	50.51	63.26
GL50803_14679	Protein 21.1	84	72	60.485	62.335	61.16
GL50803_33809	hypothetical protein	9	8	71.18	53.04	66.04
GL50803_7718	DNA-damage inducible protein DDI1-like	14	2	46.685	64.47	50.5
GL50803_21502	Kinase, putative	6	9	73.38	65.22	69.44
GL50803_13922	hypothetical protein	53	36	62.78	66.135	65.07
GL50803_114218	Gamma tubulin	27	20	72.92	69.45	72.03
GL50803_15436	hypothetical protein	14	10	87.08	67.205	77.96
GL50803_32908	hypothetical protein	48	17	72.33	84.89	75.21
GL50803_32419	hypothetical protein	23	12	104.69	124.335	113.19
GL50803_16200	Developmentally regulated GTP-binding protein 1	26	29	63.005	61.5	62.79
GL50803_8201	hypothetical protein	6	5	90.83	82.71	82.71
GL50803_8338	VSP	98	21	69.96	63.36	65.21
GL50803_17285	Protein 21.1	15	2	83.88	89.435	83.88
GL50803_15953	Kinase, NEK	24	19	65.27	58.22	63.12
GL50803_117312	hypothetical protein	11	NA	96.69	NA	96.69
GL50803_101919	5-AMP-activated protein kinase, beta-1 subunit	26	14	58.245	48.68	52.34
GL50803_6744	Centrin	41	62	62.23	62.31	62.23
GL50803_15296	hypothetical protein	21	14	72.26	73.155	72.26
GL50803_16812	hypothetical protein	21	9	55.46	69.66	63.895
GL50803_17625	Kinase, CMGC GSK	35	49	70.11	66.92	68.68
GL50803_28699	hypothetical protein	36	28	70.545	60.2	67.42
GL50803_11696	hypothetical protein	11	7	68.17	47.23	60.105
GL50803_40369	hypothetical protein	34	10	76.835	76.125	76.585
GL50803_3978	Ubiquitin-conjugating enzyme E2-17 kDa	31	45	76.87	70.3	73.095
GL50803_14158	Protein 21.1	7	5	63.09	80.68	70.54
GL50803_14404	Phosphatase	40	35	71.09	76.8	72.83
GL50803_16817	Transglutaminase/protease, putative	34	21	87.76	60.6	80.24
GL50803_137682	hypothetical protein	42	23	64.665	63.46	63.46
GL50803_23015	Serine palmitoyltransferase 1	10	1	102.845	76.14	101.85
GL50803_7559	hypothetical protein	18	5	63.405	83.77	64.69
GL50803_17336	hypothetical protein	15	8	70.45	75.93	70.45
GL50803_13874	hypothetical protein	20	19	52.745	78	62.19
GL50803_22811	unspecified product	24	17	59.08	53.63	55.07
GL50803_15016	hypothetical protein	9	7	92.54	93.04	92.75
GL50803_22808	Histidyl-tRNA synthetase	29	17	62.87	64.31	63.59
GL50803_8523	Amino acid transporter family	13	3	76.62	53.52	65.07
GL50803_6752	hypothetical protein	70	100	70.125	63.775	66.965
GL50803_7030	Prefoldin subunit 3, putative	20	31	65.25	60.46	63.86
GL50803_36515	hypothetical protein	9	6	87.17	78.44	87.17
GL50803_15514	Kinase, STE STE20	46	23	69.385	58.11	66.33
GL50803_33166	26S proteasome non-ATPase regulatory subunit 2	26	18	61.275	60.155	61.275
GL50803_7533	Angio-associated migratory cell protein	34	20	74.255	72.135	72.57
GL50803_137696	Kinase, NEK	11	6	67.04	64.52	67.04
GL50803_2483	Kinase, NEK	30	32	51.4	77.81	63.18
GL50803_93011	Protein 21.1	24	5	68.25	104.56	71.96
GL50803_33037	Zinc finger domain protein	9	10	61.79	78.27	72.19
GL50803_114462	Axonemal p66.0	37	29	83.23	65.17	76.77
GL50803_33660	Spindle pole protein, putative	26	17	57.345	52.92	56.65
GL50803_15525	hypothetical protein	23	18	83.22	71.265	81.71
GL50803_40283	hypothetical protein	21	11	72.26	72.78	72.52
GL50803_14869	Ribosomal protein L24	15	45	52.55	61.04	61.02
GL50803_15587	Protein 21.1	38	11	75.52	66.26	72.67
GL50803_15000	TFIIH P44	13	5	94.32	87.93	90.13
GL50803_11034	hypothetical protein	18	22	56.03	58.12	58.12
GL50803_3147	Protein 21.1	37	34	62.88	72.19	68.18
GL50803_9483	hypothetical protein	24	10	70.24	71.78	70.735
GL50803_1995	Proteasome subunit beta type 4 precursor	44	34	63.66	56.645	61.235
GL50803_15472	hypothetical protein	49	51	51.2	56.42	55.185
GL50803_15196	NifU-like protein	44	34	63.53	76	69.54
GL50803_14086	hypothetical protein	41	24	75.54	71.32	74.32
GL50803_16086	Ribosomal protein L2	27	48	55.23	61.405	61.25
GL50803_30851	hypothetical protein	23	40	61.04	67.99	65
GL50803_1875	hypothetical protein	26	95	56.475	64.17	63.81
GL50803_22451	Kinase, NEK	18	3	69.33	44.14	68.28
GL50803_24512	Neurogenic locus notch-like protein	26	14	79.16	93.46	84.585
GL50803_9916	hypothetical protein	18	15	63.945	74.39	72.04
GL50803_16444	Protein 21.1	12	4	85.535	94.015	87.05
GL50803_27364	hypothetical protein	14	9	69.78	70.79	70.39
GL50803_91911	Translation initiation factor eIF-2B alpha subunit	23	14	77.86	73.155	76.46
GL50803_15292	hypothetical protein	15	16	76.44	66.87	70.96
GL50803_10882	hypothetical protein	95	127	75.21	66.04	69.48
GL50803_15046	Ribosomal protein L26	52	19	49.64	54.19	51.04
GL50803_90089	hypothetical protein	11	12	52.69	58.07	54.46
GL50803_14457	Ripening regulated protein DDTFR19	20	33	61.835	67.58	66.56
GL50803_17097	Protein 21.1	55	15	63.28	59.42	62.295
GL50803_6671	hypothetical protein	26	11	75.76	91.7	77.41
GL50803_6304	Fe-hydrogenase-1	77	71	75.93	62.25	69.035
GL50803_103891	Chaperonin 60	13	6	66.44	47.1	56.44
GL50803_14997	hypothetical protein	24	10	83.205	77.32	81.54
GL50803_16802	Kinase, CMGC CDK	38	82	73.34	68.36	69.445
GL50803_9011	Glycyl-tRNA synthetase	38	23	83.255	69.24	77.59
GL50803_112063	hypothetical protein	25	6	87.13	108.205	89.17
GL50803_12147	hypothetical protein	14	6	73.99	58.16	66.725
GL50803_15591	Coiled-coil protein	68	21	76.23	49.77	71.75
GL50803_37874	hypothetical protein	13	1	80.62	45.81	76.615
GL50803_16980	hypothetical protein	18	2	76.19	56.02	76.19
GL50803_118641	hypothetical protein	8	10	91.02	92.335	91.98
GL50803_28234	Adenylate kinase	43	35	58.4	72.85	68.675
GL50803_4509	ERP1	64	42	66.35	69.715	66.48
GL50803_13875	Phosphatase	25	5	73.3	69.83	71.935
GL50803_10697	hypothetical protein	48	19	56.155	57.46	56.44
GL50803_21342	hypothetical protein	20	8	63.365	52.915	61.705
GL50803_11220	Syntaxin 18	14	5	80.705	95.12	83.61
GL50803_13694	hypothetical protein	17	9	76.82	62.17	72.845
GL50803_21327	ABC transporter, ATP-binding protein	8	4	77.62	93.845	80.64
GL50803_9658	Kinase, NEK	24	17	54.785	55.35	55
GL50803_6054	RNA binding protein, putative	17	24	69	53.065	62.52
GL50803_6886	hypothetical protein	10	7	32.985	80.44	43.26
GL50803_8464	hypothetical protein	24	12	75.465	71.92	74.46
GL50803_15461	hypothetical protein	16	14	75.485	64.96	68.8
GL50803_16311	Centromere/microtubule binding protein CBF5	34	16	66.34	52.235	61.48
GL50803_19378	hypothetical protein	35	27	66.96	53.73	60.54
GL50803_9327	Kinase, NEK	7	10	72.85	63.935	65
GL50803_29252	hypothetical protein	39	33	71.04	68.08	69.2
GL50803_112258	hypothetical protein	11	11	77.07	37.75	72.58
GL50803_113165	hypothetical protein	14	8	82.915	103.295	93.205
GL50803_22504	hypothetical protein	17	6	70.52	64.685	70.52
GL50803_11100	TRP domain containing protein	13	5	77.08	62.58	76.2
GL50803_87826	hypothetical protein	31	4	73.15	101.33	74.93
GL50803_28379	Multidrug resistance-associated protein 1	38	16	55.98	66.545	62.175
GL50803_14708	hypothetical protein	13	2	69.73	84.98	69.73
GL50803_6170	Coatomer delta subunit	24	18	46.175	64.15	58.855
GL50803_27635	hypothetical protein	25	25	74.12	87	81.77
GL50803_5772	CDC72	23	14	85.17	80.865	85.17
GL50803_25035	Protein tyrosine phosphatase	17	10	71.76	63.32	68.15
GL50803_112557	hypothetical protein	31	14	62.35	64.74	62.35
GL50803_17083	hypothetical protein	24	21	67.71	57.4	62.29
GL50803_4043	Serologically defined colon cancer antigen 1	11	4	74.57	83.455	74.57
GL50803_11319	U3 small nucleolar ribonucleoprotein protein IMP3, putative	21	11	58.43	43.4	54.98
GL50803_11595	hypothetical protein	29	29	69.27	58.5	64.33
GL50803_86945	hypothetical protein	19	4	87.09	70.3	79.23
GL50803_7134	hypothetical protein	16	6	89.73	72.385	80.445
GL50803_16929	hypothetical protein	15	4	83.08	82.52	83.08
GL50803_10238	hypothetical protein	29	28	65.96	60.71	62.92
GL50803_114440	hypothetical protein	81	107	63.17	65.07	63.845
GL50803_137727	High cysteine membrane protein EGF-like	25	3	74.04	61.15	71.8
GL50803_17261	hypothetical protein	41	29	81.46	69.16	76.345
GL50803_13943	Eukaryotic translation initiation factor 2 alpha subunit	45	49	67.17	66.16	67.15
GL50803_3603	hypothetical protein	15	9	74.82	81.08	79.76
GL50803_6980	DNA pol/primase, large sub	18	6	75.25	91.87	79.17
GL50803_15868	Mitogen-activated protein kinase kinase kinase 1	6	4	88.37	47.615	62.515
GL50803_10711	Serine/Threonine protein phosphatase	18	8	84.87	89.9	84.87
GL50803_4767	Protein 21.1	22	38	68.635	62.935	63.54
GL50803_111869	hypothetical protein	16	6	64.64	89.61	81.035
GL50803_103001	VSP	33	26	73.75	78.935	76.71
GL50803_3755	hypothetical protein	28	12	74.075	71.985	72.255
GL50803_101451	hypothetical protein	11	7	87.82	80.46	85.355
GL50803_9276	Variant-specific surface protein	46	114	64.6	59.31	60.38
GL50803_17524	hypothetical protein	14	9	68.7	66.13	66.13
GL50803_16288	hypothetical protein	16	13	75.6	56.91	71.2
GL50803_34526	hypothetical protein	14	NA	66.59	NA	66.59
GL50803_112368	hypothetical protein	13	12	73.46	86.82	77.12
GL50803_8140	GTP-binding protein ARD-1, putative	20	15	68.355	68.34	68.34
GL50803_17604	hypothetical protein	33	38	52.68	57.22	54.77
GL50803_98054	Heat shock protein HSP 90-alpha	35	121	64.67	61.84	62.71
GL50803_8049	hypothetical protein	21	14	69.62	78.24	72.58
GL50803_14058	CAMP-specific 3,5-cyclic phosphodiesterase 4B	16	8	74.775	79.95	74.775
GL50803_94582	Ornithine decarboxylase	44	26	65.455	72.54	66.295
GL50803_15090	L-serine dehydratase	42	37	77.84	72.58	74.84
GL50803_17585	Protein 21.1	12	17	81.94	54.14	70.97
GL50803_137703	Protein 21.1	113	75	65.04	59.54	63.25
GL50803_9088	4-methyl-5-thiazole monophosphate biosynthesis enzyme	10	11	77.405	58.66	66.19
GL50803_9750	Intraflagellar transport protein component IFT74/72	16	5	78.55	61.66	77.59
GL50803_16893	Tip elongation aberrant protein 1	10	6	84.165	46.405	72.565
GL50803_22573	hypothetical protein	20	9	76.58	66.12	71.12
GL50803_93551	Metalloprotease, insulinase family	28	13	70.44	62.19	68.68
GL50803_32312	Protein phosphatase 2C	27	20	72.96	75.71	73.75
GL50803_10703	Protein 21.1	33	24	81.12	58.39	73.11
GL50803_93275	Translational activator GCN1	16	8	54.75	64.425	55.98
GL50803_137721	VSP	38	NA	64.59	NA	64.59
GL50803_13998	Threonyl-tRNA synthetase	44	8	67.435	68.885	67.435
GL50803_115202	VSP	12	8	84.025	95.995	88.82
GL50803_17392	Kinase	16	3	80.325	44.93	80
GL50803_33218	Dynein intermediate chain	24	22	71.9	71.32	71.32
GL50803_10452	hypothetical protein	9	20	92.83	97.69	95.92
GL50803_87926	hypothetical protein	24	12	75.625	73.67	75.625
GL50803_92498	Kinase, NEK	20	5	70.61	51.75	68.33
GL50803_14863	hypothetical protein	24	5	91.58	90.84	91.36
GL50803_32999	hypothetical protein	50	41	65.545	63.43	63.43
GL50803_13791	ATP-dependent RNA helicase	20	13	76.405	59.83	59.96
GL50803_15022	hypothetical protein	9	7	97.58	95.88	96.73
GL50803_14903	hypothetical protein	8	4	49.01	90.46	54.065
GL50803_9087	hypothetical protein	12	8	65.835	78.715	66.625
GL50803_17538	Phosphoprotein phosphatase 2A regulatory subunit	16	11	66.535	74.48	71.57
GL50803_7909	Amino acid transporter family	38	15	68.23	62.19	65.3
GL50803_6789	unspecified product	8	3	78.63	124.62	89.5
GL50803_10868	hypothetical protein	29	24	60.85	70.745	64.12
GL50803_118642	hypothetical protein	9	7	104.58	93.81	99.195
GL50803_95661	Tubulin tyrosine ligase	8	5	97.525	93.42	97.46
GL50803_92132	hypothetical protein	16	7	80.405	67.5	78.33
GL50803_8524	Transitional endoplasmic reticulum ATPase	9	8	67.92	64.115	67.92
GL50803_13622	hypothetical protein	40	13	66.11	61.18	64.13
GL50803_101212	hypothetical protein	8	5	58.915	71.21	59.5
GL50803_8727	hypothetical protein	24	14	70.73	55.78	66.525
GL50803_14488	Cyclin A	19	21	58.14	72.59	67.99
GL50803_113656	Cysteine protease	20	5	76.2	58.43	67.04
GL50803_12741	hypothetical protein	19	16	66.96	59.89	63.12
GL50803_14519	Cysteine desulfurase	28	15	89.27	49.88	78.52
GL50803_11364	Kinase, AGC AKT	28	32	77.77	76.52	76.52
GL50803_112681	NSF	53	27	69	72.4	69.775
GL50803_6524	Ubiquitin-conjugating enzyme E2-28.4 kDa	14	12	82.205	82.03	82.03
GL50803_14213	hypothetical protein	39	34	65.17	68.055	65.96
GL50803_2173	unspecified product	6	10	91.585	109.325	108.285
GL50803_103783	Protein 21.1	34	24	69.675	62.56	69.1
GL50803_17320	Coiled-coil protein	17	8	85.11	69.98	80.8
GL50803_14507	hypothetical protein	10	7	64.5	69.52	65
GL50803_90710	hypothetical protein	25	27	77.96	75.81	76.845
GL50803_10783	Thiosulfate sulfurtransferase	16	9	87.38	87.32	87.32
GL50803_100888	unspecified product	5	5	78.04	90.4	87.285
GL50803_14093	hypothetical protein	9	7	107.36	108.04	107.7
GL50803_12220	Hydrolase, putative	42	27	60.9	60.28	60.28
GL50803_24505	Hypothetical protein	10	3	70.795	41.56	63.48
GL50803_16067	hypothetical protein	14	20	74.305	64.255	72.75
GL50803_4344	hypothetical protein	32	16	56.205	64.77	57.785
GL50803_12163	hypothetical protein	6	9	82.875	53.41	60.42
GL50803_10239	hypothetical protein	16	8	83.89	80.705	81.335
GL50803_29327	hypothetical protein	66	105	75.615	64.75	66.8
GL50803_5822	hypothetical protein	4	6	73.56	72.435	72.435
GL50803_32399	hypothetical protein	24	9	78.725	85.12	79.29
GL50803_91707	High cysteine membrane protein Group 1	30	5	73.335	57.69	72.3
GL50803_115338	hypothetical protein	19	11	54.3	52.36	53.44
GL50803_16647	hypothetical protein	14	4	84.655	58.035	81.175
GL50803_14375	Asparaginyl-tRNA synthetase	81	44	73.5	70.57	72.58
GL50803_25951	unspecified product	7	10	84.62	82.31	82.41
GL50803_4711	hypothetical protein	5	6	84.96	61.03	64.06
GL50803_87928	Kinase, NEK	24	13	58.3	48.83	57.04
GL50803_115337	hypothetical protein	24	15	63.47	39.09	61.76
GL50803_16180	Protein phosphatase methylesterase-1	41	40	73.29	71.19	72.48
GL50803_10460	hypothetical protein	18	13	65.665	70.89	70.89
GL50803_14897	Kinase, NEK	9	5	82.77	50.88	79.065
GL50803_22136	hypothetical protein	17	17	61.62	71.04	68.665
GL50803_17246	hypothetical protein	8	5	79	42.5	65.26
GL50803_14456	Low molecular weight protein-tyrosine-phosphatase	53	39	61.12	68.42	62.22
GL50803_95693	hypothetical protein	20	22	57.615	86.83	71.755
GL50803_16266	hypothetical protein	18	15	63.52	44.57	51.28
GL50803_14254	Protein 21.1	52	35	69.8	59.87	66.23
GL50803_2508	hypothetical protein	13	7	78.04	50.48	64.425
GL50803_7662	RNase L inhibitor	32	15	60.19	39.24	54.2
GL50803_115047	VSP	20	3	64.585	91.22	72.15
GL50803_4337	hypothetical protein	11	13	90.2	67.96	69.46
GL50803_15522	hypothetical protein	17	13	66.19	75.71	69.175
GL50803_10840	DNA-directed RNA polymerases I and III 16 kDa polypeptide	41	32	80.52	69.945	73.41
GL50803_5183	hypothetical protein	12	4	88.215	46.895	69.6
GL50803_16915	Protein 21.1	10	14	67.025	61.055	64.51
GL50803_7421	Casein kinase II beta chain	27	21	74.22	62.28	66.48
GL50803_4259	hypothetical protein	12	8	82.7	67.64	71.545
GL50803_14947	hypothetical protein	9	6	32.64	76.93	55.12
GL50803_14400	hypothetical protein	21	22	74.35	76.26	75.25
GL50803_6177	Ribosome subunit biogenesis protein NIP7	18	12	77.5	64.135	70.065
GL50803_32786	Coiled-coil protein	4	11	115.34	67.04	71.89
GL50803_14275	hypothetical protein	64	12	61.885	69.82	62.395
GL50803_17284	Protein 21.1	18	4	88.86	80.08	87.32
GL50803_114921	hypothetical protein	12	7	68.31	80.81	78.12
GL50803_8218	Kinase, NEK	12	3	72.18	71.96	71.96
GL50803_11380	hypothetical protein	29	37	61.39	65.16	62.14
GL50803_136004	VSP	48	11	69.645	63.59	66.66
GL50803_32531	hypothetical protein	6	11	109.335	86.23	87.42
GL50803_16069	Phosphoacetylglucosamine mutase	15	9	81.7	68.67	78.48
GL50803_15972	Protein 21.1	12	1	78.885	82.62	79.81
GL50803_9508	Metalloprotease, insulinase family	33	12	63.08	57.095	61.59
GL50803_90665	hypothetical protein	13	1	73.59	83.57	74.815
GL50803_7427	Hypothetical protein	19	23	52.08	52.8	52.44
GL50803_7876	hypothetical protein	9	2	71.87	47.14	63.61
GL50803_13747	C4 group specific protein	12	5	80.63	77.25	77.25
GL50803_96324	hypothetical protein	7	3	89.79	116.91	93.91
GL50803_16612	Tyrosyl-tRNA synthetase	21	18	62.32	80.84	70.04
GL50803_3679	hypothetical protein	5	17	104.16	64.35	65.23
GL50803_14651	Glucosamine 6-phosphate N-acetyltransferase	27	19	63.41	61.53	63.13
GL50803_9349	hypothetical protein, similar to AMMECR1	25	35	72.18	70.81	72.005
GL50803_8880	hypothetical protein	5	9	44.3	60.08	57.075
GL50803_103205	hypothetical protein	10	4	73.945	75.625	75.625
GL50803_5462	Delta tubulin	18	9	58.735	80.07	63.23
GL50803_34160	Hypothetical protein	19	16	58.96	66.2	61.73
GL50803_7807	WD-40 repeat protein	18	10	60.345	71.175	61.545
GL50803_15549	Dynein binding protein, putative	22	25	83.305	69.29	72.57
GL50803_8652	hypothetical protein	20	9	86.12	93.85	89.28
GL50803_4365	26S protease regulatory subunit 6A	43	26	76.47	79.05	77.16
GL50803_15501	CDC50	12	7	93.38	80.92	92.64
GL50803_122566	VSP	21	4	61.82	48.57	61.79
GL50803_13413	hypothetical protein	24	19	87.995	56.17	64.96
GL50803_100887	Methyltransferase, putative	13	4	50.3	57.68	50.3
GL50803_16993	FtsJ cell division protein, putative	30	12	58.475	55.485	57.33
GL50803_40747	hypothetical protein	12	NA	79.43	NA	79.43
GL50803_7664	hypothetical protein	52	31	63.915	60.5	63.5
GL50803_14807	Protein 21.1	10	12	68.735	66.36	68.735
GL50803_16707	Clusterin associated protein 1, putative	13	11	66.47	46.83	63.48
GL50803_21897	hypothetical protein	18	9	70.12	80.04	74.79
GL50803_5820	hypothetical protein	15	7	90.24	50.39	83.335
GL50803_22587	hypothetical protein	22	12	70.64	70.185	70.64
GL50803_14650	Ser/Thr phosphatase 2C, putative	10	3	70.71	70.76	70.76
GL50803_34334	hypothetical protein	22	3	83.615	56.25	81
GL50803_98058	VSP	30	7	72.77	65.58	71.18
GL50803_16575	ABC transporter family protein	50	27	63.15	83.85	69.5
GL50803_8242	Ribosome biogenesis protein Nop10	44	51	70.105	65.69	67.08
GL50803_16761	hypothetical protein	12	10	54.56	78.49	66.065
GL50803_11209	Cathepsin L precursor	7	13	71.96	71.04	71.5
GL50803_39717	hypothetical protein	11	4	89.31	98.73	92.64
GL50803_15204	ERP3	10	12	70.835	82.715	78.635
GL50803_24603	hypothetical protein	21	4	68.65	84.98	75.93
GL50803_6508	hypothetical protein	38	28	66.41	78.68	71.635
GL50803_13699	hypothetical protein	21	9	75.77	73.25	74.51
GL50803_17241	hypothetical protein	15	28	70	62.965	65.58
GL50803_10850	hypothetical protein	37	39	59.8	52.62	55.485
GL50803_16297	hypothetical protein	10	21	86.29	76.25	78.95
GL50803_16792	Kinase, NEK	6	5	54.7	83.5	54.71
GL50803_16773	hypothetical protein	26	11	54.605	51.24	54.29
GL50803_87181	unspecified product	21	5	82.67	89.39	83.085
GL50803_14539	Protein 21.1	14	2	55.945	78.395	59.205
GL50803_14950	hypothetical protein	11	6	66.43	59.075	62.08
GL50803_11040	Kinase, NEK	7	15	65.44	76.78	68.24
GL50803_95876	unspecified product	8	3	69.32	73.52	71.04
GL50803_7653	Kinase, NEK-like	17	9	65.97	61.21	64.3
GL50803_13783	hypothetical protein	46	29	85.675	90.28	89.17
GL50803_14989	hypothetical protein	13	12	60.31	68.045	66.4
GL50803_16615	hypothetical protein	21	7	74.68	56.42	62.575
GL50803_95064	tRNA-ribosyltransferase, putative	21	12	61.86	78.26	62.65
GL50803_31453	unspecified product	18	5	86.72	63.26	82.23
GL50803_16050	hypothetical protein	10	11	69.095	90.15	72.9
GL50803_17385	hypothetical protein	8	3	80.88	80.62	80.62
GL50803_20020	hypothetical protein	18	2	76.93	57.285	76.93
GL50803_87817	Tubby superfamily protein	21	8	71.64	53.24	66.17
GL50803_4192	ARL2	7	7	56.32	71.3	58.52
GL50803_21331	26S protease regulatory subunit 7	22	8	66.125	58.295	66.125
GL50803_16537	Protein 21.1	6	5	88.36	48.85	85.12
GL50803_13007	Zinc finger domain protein	19	11	65.87	55.23	65.12
GL50803_8657	hypothetical protein	42	30	61.625	71.345	61.625
GL50803_15962	Kinesin-7	20	4	72.715	77.355	72.715
GL50803_89887	Nucleolar GTP-binding protein 2	10	8	75.8	50.06	59.53
GL50803_16429	hypothetical protein	12	17	54.31	55.68	55.68
GL50803_16034	Kinase, CAMK CAMKL	40	28	67.245	62.135	65.755
GL50803_103810	Protein 21.1	20	7	75.04	68.08	73.04
GL50803_17236	hypothetical protein	31	14	90.67	95.375	93.25
GL50803_17345	Coatomer zeta subunit	36	53	65.91	67.5	66.84
GL50803_93721	Cyclin fold protein 1, putative	8	3	85.655	60.19	64.76
GL50803_15376	hypothetical protein	16	6	60.195	79.23	62.495
GL50803_17223	IFT complex B	30	20	70.2	65.495	67.275
GL50803_115066	High cysteine membrane protein VSP-like	29	9	76.38	72.11	75.285
GL50803_9506	hypothetical protein	19	10	72.21	71.72	72.21
GL50803_3267	unspecified product	7	12	88.37	85.395	85.41
GL50803_8471	Gp49, putative	33	17	71.92	62.9	70.075
GL50803_14017	High cysteine membrane protein Group 2	27	5	64.59	47.66	61.45
GL50803_88349	hypothetical protein	5	5	53.14	34.42	37.415
GL50803_17037	hypothetical protein	57	20	63.64	67.795	64.08
GL50803_15847	Hypothetical protein	37	25	68.26	71.63	70.64
GL50803_29796	hypothetical protein	24	13	65.615	89.81	72.25
GL50803_4039	Leucine-rich repeat protein	79	58	75.22	67.47	71.7
GL50803_1894	U3 small nucleolar RNA-associated protein 11, putative	22	9	68.02	67.06	67.79
GL50803_7680	Protein 21.1	8	3	70.62	38.39	69.39
GL50803_15473	hypothetical protein	7	3	49.04	62.45	55.745
GL50803_137752	VSP	21	7	67.8	74.86	71.075
GL50803_15156	SRP GTPase	25	19	66.75	59.65	65.03
GL50803_16678	hypothetical protein	29	19	59.27	75.78	65.56
GL50803_21411	ABC transporter, ATP-binding protein	23	20	70.61	64.165	70.21
GL50803_5823	hypothetical protein	6	9	62.76	58.96	58.96
GL50803_38104	Phospholipid-transporting ATPase IIB, putative	40	13	72.895	72.17	72.75
GL50803_7439	Ser/Thr phosphatase 2A, 65kDa reg sub A	23	27	74.31	65.65	67.82
GL50803_24279	hypothetical protein	30	23	67.57	58.88	64.25
GL50803_28232	hypothetical protein	9	12	58.42	60.26	58.42
GL50803_4026	Alpha-19 giardin	25	24	56.56	71.215	61.94
GL50803_22455	hypothetical protein	8	7	55.5	47.75	52.88
GL50803_14713	IFT complex B	21	10	79.68	68.86	77.44
GL50803_16765	Kinase, NEK	23	15	67.85	75.56	69.295
GL50803_91198	Sigma adaptin	15	17	74.74	77.19	75.965
GL50803_17329	hypothetical protein	11	2	58.81	75.925	58.81
GL50803_1935	Zinc finger domain protein	9	3	89.42	107.54	89.73
GL50803_16127	Replication factor C, subunit 5	12	5	78.915	53.09	64.21
GL50803_134209	Protein kinase gPK1	22	4	69.235	57.82	69.235
GL50803_12058	hypothetical protein	11	2	58.46	113.48	66.04
GL50803_24818	hypothetical protein	6	9	64.11	83.61	68.52
GL50803_4692	hypothetical protein	35	38	67.23	73.52	68.57
GL50803_6700	Kinase, CMGC RCK	21	20	79.36	56.65	68.61
GL50803_11551	hypothetical protein	8	4	69.535	90.565	74.94
GL50803_9741	ABC transporter, ATP-binding protein	22	11	65.04	61.74	61.74
GL50803_8428	Kinase, NEK	23	7	81.04	83.31	82.185
GL50803_5568	hypothetical protein	23	21	76.36	75.1	75.165
GL50803_13851	hypothetical protein	9	7	63.78	93.85	72.03
GL50803_16613	hypothetical protein	11	4	57.46	47.71	50.55
GL50803_5567	hypothetical protein	7	6	73.19	54.635	66.45
GL50803_7982	UDP-glucose 4-epimerase	13	3	78.34	66	77.275
GL50803_17111	hypothetical protein	10	2	60.345	73.75	70.04
GL50803_9492	Coiled-coil protein	12	6	68.815	53.355	63.21
GL50803_21233	hypothetical protein	11	6	69.24	90.535	72.81
GL50803_7765	hypothetical protein	11	14	52.96	73.935	67.33
GL50803_15983	Prolyl-tRNA synthetase	65	35	75.48	76.09	75.555
GL50803_13962	Hydroxymethylglutaryl-CoA synthase	12	11	77.81	74.82	74.82
GL50803_16541	Protein 21.1	6	4	71.095	75.585	72.93
GL50803_8565	Yip	32	11	67.75	63.7	66.54
GL50803_116560	unspecified product	10	4	73.97	73.255	73.97
GL50803_40521	hypothetical protein	28	29	66.955	69.31	68.65
GL50803_95563	Phosphorylase B kinase gamma catalytic chain	16	10	70.505	82.16	76.095
GL50803_13475	Axoneme-associated protein GASP-180	48	9	63.24	45	61.38
GL50803_137605	VSP with INR	22	22	72.815	69.14	69.585
GL50803_34141	Nin one binding protein-like protein	21	16	61.7	71.15	69.19
GL50803_1890	3 exoribonuclease, putative	13	10	82.15	103.81	89.61
GL50803_87774	hypothetical protein	16	11	85.09	65.83	82.42
GL50803_31454	hypothetical protein	9	3	59.37	73.63	65.3
GL50803_91476	hypothetical protein	17	3	61	65.42	63.21
GL50803_113357	VSP	66	6	64.885	55.385	64.885
GL50803_10562	VSP	16	10	72.865	59.25	70.88
GL50803_8253	hypothetical protein	27	17	84.93	73.73	79.805
GL50803_92602	hypothetical protein	14	6	64.5	87.01	74.3
GL50803_16572	N-terminal acetyltransferase complex ARD1 subunit, putative	10	16	87.26	70.075	79.055
GL50803_3409	Coiled-coil protein	20	5	56.01	69.43	58.96
GL50803_16192	hypothetical protein	14	10	72.5	76.44	73.88
GL50803_27190	hypothetical protein	12	9	83.935	60.62	72.3
GL50803_11749	hypothetical protein	22	5	65.17	40.24	63.86
GL50803_14469	Synaptobrevin-like protein	73	61	65.56	68.73	67.73
GL50803_5648	hypothetical protein	11	6	66.48	48.745	60.33
GL50803_8195	hypothetical protein	15	3	88.5	95.54	89.645
GL50803_7896	26S proteasome non-ATPase regulatory subunit 7	9	13	50.57	84.37	73.11
GL50803_15386	Phosphatase similar to the C-terminal domain of histone macroH2A1	30	20	64.595	57.515	61.99
GL50803_9154	GARP-like protein 3	13	4	72.57	100.05	76.92
GL50803_27520	Kinase, CMGC CK2	14	13	67.16	59.84	61.28
GL50803_14510	Protein 21.1	11	4	57.08	66.88	60.12
GL50803_21512	S-adenosylmethionine-dependent methyltransferase, putative	14	8	75.4	75.26	75.26
GL50803_8405	hypothetical protein	44	16	55.78	54.25	55.78
GL50803_14637	hypothetical protein	33	11	61.03	86.78	66.03
GL50803_7413	hypothetical protein	16	21	99.96	91.43	97.8
GL50803_9184	Transducin	12	1	82.065	35	81.5
GL50803_17541	WD-repeat domain 17 isoform 1	8	2	60.62	94.695	80.2
GL50803_14311	Serine/threonine protein phosphatase PP-X isozyme 2	14	14	75.98	54.34	61.03
GL50803_91334	Kinase, NEK-frag	9	3	86.93	79.16	83.045
GL50803_4590	hypothetical protein	28	25	59.805	53.64	56.2
GL50803_7474	DNA-directed RNA polymerase RPB3	13	11	90.72	83.87	86.92
GL50803_114773	Cysteine protease	9	1	39.07	39.68	39.375
GL50803_17402	Protein 21.1	13	1	52.48	54.18	53.33
GL50803_137680	Cathepsin L-like protease	15	11	76.37	88.68	77.645
GL50803_9520	hypothetical protein	18	24	78.525	74.055	74.655
GL50803_101307	Kinase, NEK	18	22	62.65	66.46	63.48
GL50803_115159	hypothetical protein	36	25	77.63	62.09	68.04
GL50803_13904	hypothetical protein	29	31	60.31	61.15	61.09
GL50803_7035	hypothetical protein	24	21	84.98	65.46	74.88
GL50803_16658	hypothetical protein	8	10	76.335	83.3	77.945
GL50803_4235	Nuclear LIM interactor-interacting factor 1	18	7	79.13	79.52	79.37
GL50803_35428	Valine-tRNA ligase	27	22	86.4	59.97	74.21
GL50803_113554	26S proteasome ATPase subunit S4, putative	46	29	75.74	66.96	71.41
GL50803_95639	hypothetical protein	8	7	69.88	82.96	82.96
GL50803_6558	hypothetical protein	24	6	82.775	75.73	82.09
GL50803_16214	MCM3	10	2	63.555	63.355	63.355
GL50803_6896	hypothetical protein	29	31	76	76.54	76.45
GL50803_13528	Sec1 vATPase	18	13	74.865	72.57	74.04
GL50803_7717	hypothetical protein	36	28	59.875	78.445	74.02
GL50803_8037	Kinase, CMGC CDK	26	29	62.43	71.27	69.04
GL50803_101810	Phospholipid-transporting ATPase IIB, putative	14	18	82.955	76.965	77.595
GL50803_113137	hypothetical protein	11	8	60.54	62.595	60.92
GL50803_103164	H-SHIPPO 1	7	8	91.26	45.605	69.94
GL50803_112978	Chromodomain helicase-DNA-binding protein, putative	15	5	55.17	88.56	69.685
GL50803_8189	Ubiquitin carboxyl-terminal hydrolase 14	24	14	85.425	56.855	74.955
GL50803_6007	Protein 21.1	15	24	50.46	78.185	71.46
GL50803_14071	hypothetical protein	12	4	76.14	86.53	79.455
GL50803_14545	Serine/threonine protein phosphatase PP1 isozyme 7	16	9	85.465	97.73	87.93
GL50803_102890	BUB3	34	7	70.015	66.16	68.79
GL50803_116201	hypothetical protein	76	NA	63.24	NA	63.24
GL50803_16601	hypothetical protein	12	7	53.96	58.15	54.5
GL50803_4313	VSP	15	8	65.61	56.435	64.92
GL50803_41927	hypothetical protein	67	39	64.5	65.79	64.78
GL50803_11105	hypothetical protein	24	20	80.77	61.665	70.61
GL50803_15250	High cysteine membrane protein Group 6	49	29	101.31	115	104.79
GL50803_2970	Translation initiation factor 2 gamma subunit	21	19	54.48	66.75	59.355
GL50803_17279	hypothetical protein	5	9	48.87	61.64	55.255
GL50803_7009	Adenylate kinase	16	18	77.62	83.185	80.78
GL50803_12109	hypothetical protein	34	19	65.965	58.14	63.97
GL50803_16543	hypothetical protein	19	18	58.24	70.42	61.22
GL50803_17205	5' nucleotidase family protein	12	9	84.78	95.58	85.2
GL50803_10422	hypothetical protein	20	24	80.29	71.915	77.74
GL50803_14135	Nucleoside diphosphate kinase	17	20	72.79	68.725	71.54
GL50803_3171	UBCE14	17	14	68.29	64.305	67.54
GL50803_13863	hypothetical protein	6	4	72.75	82.12	78.32
GL50803_10423	hypothetical protein	37	51	62.13	56.63	61.855
GL50803_11647	hypothetical protein	24	8	66.08	62.905	66.08
GL50803_7990	Translation elongation factor	25	26	57.96	67.765	64
GL50803_90425	hypothetical protein	51	25	64.72	75.62	66.145
GL50803_16954	hypothetical protein	10	4	56.95	47.52	56.255
GL50803_134673	unspecified product	5	5	66.65	43.71	62.095
GL50803_14689	hypothetical protein	13	7	70.74	44.48	59.22
GL50803_10062	hypothetical protein	18	14	88.25	67.445	80.83
GL50803_4081	hypothetical protein	10	16	68.965	52.13	58.165
GL50803_3419	hypothetical protein	13	15	62.88	66.21	64.545
GL50803_23389	hypothetical protein	23	5	74.45	56.25	73.8
GL50803_13651	hypothetical protein	22	22	72.315	75.615	74.45
GL50803_17429	Tubulin, small gamma tubulin complex gcp2	11	3	51.04	31.28	50.935
GL50803_37985	Dynein heavy chain	41	19	58.7	58.52	58.61
GL50803_12867	hypothetical protein	14	16	77.47	74.87	74.87
GL50803_26749	hypothetical protein	6	5	76.28	81.54	81.54
GL50803_102170	hypothetical protein	12	6	87.375	79.595	86.52
GL50803_3896	Sec61-gamma	41	52	55.3	58.15	58
GL50803_27739	hypothetical protein	8	5	68.835	63.72	65.92
GL50803_31983	hypothetical protein	12	1	78.315	53.87	69.46
GL50803_24122	Spindle pole protein, putative	6	6	76.855	86.175	80.41
GL50803_8245	Glucosamine-6-phosphate deaminase	46	38	71.135	69.25	70.49
GL50803_135885	hypothetical protein	11	9	69.46	68.58	69.02
GL50803_15076	hypothetical protein	14	5	59.015	85.56	64.86
GL50803_8074	Manganese-dependent inorganic pyrophosphatase, putative	33	17	73.15	89.63	77.535
GL50803_17005	Protein 21.6	18	13	75.45	52.39	72.34
GL50803_9481	Dynein-like protein	18	8	51.625	74.54	63.42
GL50803_23492	Protein 21.1	40	33	61.21	66.4	62.24
GL50803_11044	Mob1-like protein	25	30	63.56	70.985	69.69
GL50803_10901	hypothetical protein	23	15	78.75	53.97	67.98
GL50803_113662	hypothetical protein	9	14	76.12	79.425	76.54
GL50803_17155	hypothetical protein	4	7	68.8	59.11	63.04
GL50803_14621	hypothetical protein	21	20	49.16	59.575	57
GL50803_29277	hypothetical protein	7	4	66.28	43.555	57.93
GL50803_8163	Manganese-dependent inorganic pyrophosphatase, putative	28	29	73.765	78.5	76.36
GL50803_6259	GA binding protein beta-1 chain	8	3	77.98	102.48	83.6
GL50803_93372	hypothetical protein	3	7	10.19	113.42	86.68
GL50803_14787	Type II inositol-1,4,5-trisphosphate 5-phosphatase precursor	13	15	73.33	81.96	80
GL50803_16679	hypothetical protein	8	12	66.495	82.005	76.05
GL50803_88730	unspecified product	16	4	63.51	80.335	69.945
GL50803_10341	hypothetical protein	10	16	82.09	64.02	67.975
GL50803_113242	VSP	8	10	75.525	72.525	74.305
GL50803_17119	hypothetical protein	11	11	65.42	48.19	58.21
GL50803_7663	hypothetical protein	12	3	90.675	56.46	89.74
GL50803_15589	hypothetical protein	10	7	105.88	85.86	103.14
GL50803_14916	Kinase, NEK	13	4	61.04	78.45	62.88
GL50803_89746	Pseudouridylate synthase, putative	22	9	81.9	52.75	79.31
GL50803_17627	hypothetical protein	21	10	82.64	45.2	73.92
GL50803_92741	Kinase, CMGC CLK	17	6	72.63	76.165	72.63
GL50803_4343	Zinc finger domain protein	6	4	52.545	78.825	68.595
GL50803_9376	Sec23	29	9	70.2	61.66	69.4
GL50803_6835	Brix domain containing protein	13	14	64.39	61.595	61.69
GL50803_100635	hypothetical protein	21	11	77.58	79.33	78.455
GL50803_8848	hypothetical protein	13	11	72.57	78.42	75.065
GL50803_16925	hypothetical protein	9	6	51.23	95.665	80.94
GL50803_2267	hypothetical protein	12	8	62.71	68.005	65.135
GL50803_23017	hypothetical protein	24	25	72.285	55.59	56.53
GL50803_8589	Suppressor of actin 1	22	14	79	80.31	79.095
GL50803_15834	hypothetical protein	16	10	52.295	73.86	59.87
GL50803_3475	Protein 21.1	11	4	82.72	103.185	94.58
GL50803_14581	Chaperone protein DnaK HSP70	37	31	75.33	60.03	66.4
GL50803_26727	hypothetical protein	16	5	76.455	96.19	85.52
GL50803_13354	hypothetical protein	27	7	75.04	95.13	80.435
GL50803_111973	hypothetical protein	20	4	81.995	73.805	81.995
GL50803_23185	hypothetical protein, similar to SMC2	9	2	68.62	67.705	68.62
GL50803_6335	Isopentenyl-diphosphate delta-isomerase 1	18	14	71.18	87.885	79.655
GL50803_17561	ARF GAP	14	9	78.425	69.72	76.91
GL50803_91181	unspecified product	7	6	65.54	59.61	62.22
GL50803_16567	Protein phosphatase PP2A regulatory subunit A	44	23	65.165	59.75	62.96
GL50803_13603	hypothetical protein	40	45	77.94	59.06	72.84
GL50803_16390	hypothetical protein	31	12	87.35	68.285	74.14
GL50803_33230	hypothetical protein	18	18	80.25	83.085	80.25
GL50803_11237	hypothetical protein	9	5	83.86	95.52	84.41
GL50803_22543	hypothetical protein	29	43	70.11	51.13	61.54
GL50803_2201	hypothetical protein	12	12	57.955	89.51	70.32
GL50803_8916	Signal recognition particle 68kDa	24	13	63.655	77.96	69.22
GL50803_11327	hypothetical protein	7	3	74.62	46.43	72.735
GL50803_9089	Cytochrome B5, outer mitochondrial membrane	7	3	73.1	72.35	72.725
GL50803_9718	RAS-related	13	6	82.44	80.465	82.44
GL50803_12217	hypothetical protein	10	3	89.04	69.33	76.87
GL50803_32434	hypothetical protein	9	1	67.62	66.8	67.21
GL50803_8557	hypothetical protein	16	6	77	69.96	74.305
GL50803_95593	Kinase, NEK	66	80	76.305	68.8	74.21
GL50803_32134	hypothetical protein	6	6	55.485	71.055	57
GL50803_117114	hypothetical protein	5	7	79.38	66.11	68.62
GL50803_17146	Helicase	11	6	71.17	65.635	70.16
GL50803_15045	hypothetical protein	12	4	59.27	86.915	74.725
GL50803_11613	hypothetical protein	11	7	102.96	51.96	80.245
GL50803_221693	hypothetical protein	11	4	76.64	78.345	76.64
GL50803_11982	hypothetical protein	5	5	65.92	71.7	69.455
GL50803_6633	Farnesyl diphosphate synthase	35	50	68.35	74.675	73.67
GL50803_12598	KRR1	33	44	63.35	61.26	63.35
GL50803_137685	hypothetical protein	22	9	59.385	60.92	60.92
GL50803_9004	hypothetical protein	17	24	73.85	72.83	73.85
GL50803_8822	2,3-bisphosphoglycerate-independent phosphoglycerate mutase	15	17	87.77	59.18	72.375
GL50803_16425	Kinesin-5	5	7	72.73	99.12	78.325
GL50803_32938	hypothetical protein	11	6	70.45	66.81	69.75
GL50803_11599	Lysophosphatidic acid phosphatase	18	14	83.65	62.87	66.335
GL50803_34357	VSP	13	2	66.69	76.985	66.69
GL50803_86440	Peptidyl-tRNA hydrolase	14	12	61.785	49.94	57.435
GL50803_27027	hypothetical protein	10	8	71.49	34.01	55.68
GL50803_3098	hypothetical protein	23	18	78.08	80.175	79.12
GL50803_10219	Protein 21.1	21	9	60.38	62.48	61.135
GL50803_16350	hypothetical protein	15	7	79.44	84.52	80.78
GL50803_17587	CTP synthase	14	13	87.5	70.72	79.84
GL50803_5458	hypothetical protein	6	5	83.63	62.64	83.18
GL50803_5921	Ubiquitin-conjugating enzyme E2-28.4 kDa	17	15	82.24	60.43	74.095
GL50803_5186	hypothetical protein	8	6	73.055	62.845	72.5
GL50803_41401	VSP	9	2	81	115.075	82.03
GL50803_5012	hypothetical protein	9	3	69.64	45.17	69.245
GL50803_11772	hypothetical protein	18	6	90.315	125.8	103.225
GL50803_10428	Ribosomal protein L10	44	16	52.265	54.76	52.825
GL50803_112135	High cysteine membrane protein VSP-like	11	NA	65.52	NA	65.52
GL50803_14392	Metallo-beta-lactamase superfamily protein	37	36	64.73	68.995	68.57
GL50803_13832	D-tyrosyl-tRNA deacylase	29	26	61.39	54.94	59.78
GL50803_5784	hypothetical protein	11	4	67.08	65.86	67.08
GL50803_8227	ATP-binding cassette protein 5	20	21	75.2	146.56	111.96
GL50803_14270	Dynein light chain	33	38	59.42	57.415	57.48
GL50803_9073	Dual-specificity protein phosphatase	10	1	66.46	101.56	68.88
GL50803_7873	Yip interacting protein, putative	19	22	55.04	68.37	64.7
GL50803_31617	hypothetical protein	17	15	67.88	53.44	57.635
GL50803_7513	hypothetical protein	18	7	62.825	75.96	66.93
GL50803_4323	hypothetical protein	16	6	78.075	53.535	69.855
GL50803_14583	hypothetical protein	15	39	70.34	62.04	64.87
GL50803_23930	Coiled-coil protein	10	9	85.525	47.18	68.06
GL50803_89050	hypothetical protein	17	6	71.76	84.085	79.65
GL50803_9913	hypothetical protein	8	3	77.61	54.64	76.34
GL50803_10773	hypothetical protein	7	5	84.3	64.08	78.045
GL50803_5372	unspecified product	11	4	78.59	62.325	70.04
GL50803_112113	VSP	25	22	75	59.78	67.88
GL50803_10181	hypothetical protein	27	14	77.83	80.44	77.83
GL50803_1383	hypothetical protein	8	3	69.73	102.82	76
GL50803_7230	hypothetical protein	21	14	72.13	91.69	81.2
GL50803_112831	Cysteine protease	19	12	60.21	72.09	66.26
GL50803_9157	hypothetical protein	19	24	84.3	76.28	80.31
GL50803_3983	5' nucleotidase family protein	20	18	70.965	89.37	79.75
GL50803_3564	hypothetical protein	13	4	63.1	59.06	63.1
GL50803_16450	Radial-spoke protein	19	23	54.6	60.93	57.765
GL50803_6689	unspecified product	4	14	54.01	83.455	77.345
GL50803_21531	hypothetical protein	26	9	68.77	59.86	67.7
GL50803_4357	Phosphatase, putative	17	9	60.97	64.52	62.745
GL50803_27896	hypothetical protein	19	5	69.17	48.35	64.425
GL50803_10316	hypothetical protein	6	11	83.575	68.93	73.27
GL50803_16430	hypothetical protein	13	2	75.96	63.245	75.96
GL50803_10707	NAD-dependent histone deacetylase Sir2	16	10	44.505	41.585	41.885
GL50803_15339	Adaptor protein complex large chain subunit BetaA	8	2	93.855	55.3	81.76
GL50803_24485	hypothetical protein	21	18	67.68	57.655	63.42
GL50803_91354	H-SHIPPO 1	27	26	61.12	60.66	61.12
GL50803_16236	hypothetical protein	13	19	68.24	64.61	66.5
GL50803_16648	hypothetical protein	57	32	62.52	58.105	59.71
GL50803_7296	U2 small nuclear ribonucleoprotein A', putative	8	8	79.33	76.685	77.005
GL50803_6140	Kinase, NEK	22	11	86.31	89.65	87
GL50803_11214	Kinase, AGC PKA	28	19	65.765	72.32	70.54
GL50803_24528	hypothetical protein	24	12	73.56	82.17	74.905
GL50803_14200	Molybdenum cofactor sulfurase	11	21	72.4	55.46	63.23
GL50803_10410	Protein 21.1	23	11	53.36	51.96	53.295
GL50803_137697	VSP	24	8	70.7	71.77	71.77
GL50803_42676	hypothetical protein	8	12	61.32	49.41	59.23
GL50803_8587	Kinase, AGC NDR	34	20	62.195	63.84	62.195
GL50803_14843	Chaperone protein dnaJ	18	7	49.795	70.26	53.44
GL50803_28657	hypothetical protein	10	14	86.225	63.99	73.76
GL50803_119610	unspecified product	3	9	67.67	103.84	99.355
GL50803_127797	unspecified product	7	4	101.76	88.71	99.93
GL50803_3531	HZGJ	24	10	89.475	65.56	78.125
GL50803_87677	Kinase, NEK	23	18	74.42	75.775	75.31
GL50803_15604	hypothetical protein	22	29	71.205	92.63	80.7
GL50803_101906	SKD1 protein	28	44	68.125	70.165	70.165
GL50803_7422	hypothetical protein	18	8	61.5	67.19	62.985
GL50803_37418	hypothetical protein	8	3	81.735	52.82	69.1
GL50803_15446	hypothetical protein	13	15	74.43	67.12	73.31
GL50803_28651	Dipeptidyl-peptidase I precursor	12	4	96.31	83.45	96.31
GL50803_112348	hypothetical protein	10	12	73.04	82.74	73.04
GL50803_8974	hypothetical protein	17	14	63.25	58.66	62.04
GL50803_10606	CCR4-NOT transcription complex, subunit 7	10	4	54.855	53.955	54.855
GL50803_40885	hypothetical protein	9	1	60.07	140.96	61.88
GL50803_5069	hypothetical protein	12	10	84.825	67.995	78.395
GL50803_14553	CCAAT-binding transcription factor subunit C	17	9	59.35	51.46	56.46
GL50803_94322	Spastin	51	34	54.41	62.21	56
GL50803_16521	Alpha-snap	31	28	64.23	68.555	66.23
GL50803_87945	Kinase, NEK	15	4	73.21	70.49	73.21
GL50803_10908	WD-40 repeat protein family	11	8	74.65	57.115	73.04
GL50803_39548	hypothetical protein	14	14	73.125	89.155	79.19
GL50803_16283	Amino acid transporter family	21	4	90.59	99.62	90.59
GL50803_7875	E04F6.2 like protein	23	16	76.26	68.24	76.21
GL50803_1979	hypothetical protein	8	11	58.855	67.77	66.02
GL50803_88167	hypothetical protein	18	6	79.575	83.545	82.715
GL50803_137672	High cysteine membrane protein VSP-like	11	4	80.69	83.665	80.69
GL50803_26364	hypothetical protein	16	12	77.825	65.535	72.175
GL50803_113439	VSP with INR	52	3	64.695	83.11	64.79
GL50803_13590	Protein 21.1	15	7	80.84	82.79	81.815
GL50803_95918	E3 ubiquitin ligase for Rad6p required for the ubiquitination of histone H2B	13	8	82.79	63.125	71.59
GL50803_16111	HSP70 subfamily B suppressor 1	7	12	80.89	60.57	73.8
GL50803_4063	Nuclear LIM interactor-interacting factor 1	19	19	63.75	64.19	64.04
GL50803_17062	hypothetical protein	17	13	77.41	52.12	74.08
[truncated: 828 more rows]
